1     **Species boundaries to the limit: validating species delimitation methods is**  
2                     **critical to avoid taxonomic inflation in the genomic era**

3     Bernat Burriel-Carranza<sup>1\*†</sup>, Maria Estarellas<sup>1†</sup>, Gabriel Riaño<sup>1</sup>, Adrián Talavera<sup>1</sup>, Héctor Tejero-  
4                     Cicuéndez<sup>1,2</sup>, Johannes Els<sup>3</sup> and Salvador Carranza<sup>1</sup>

5     (1) *Institute of Evolutionary Biology (CSIC-Universitat Pompeu Fabra), Passeig Marítim de la Barceloneta,*  
6     *Barcelona, Spain*

7     (2) *Department of Biodiversity, Ecology and Evolution, Faculty of Biology, Universidad Complutense de*  
8     *Madrid, 28040, Madrid, Spain*

9     (3) *Breeding Centre for Endangered Arabian Wildlife, Environment and Protected Areas Authority, Sharjah,*  
10     *United Arab Emirates*

11     †: *Both authors contributed equally*

12     \*Correspondence: [bernat.burriel@ibe.upf-csic.es](mailto:bernat.burriel@ibe.upf-csic.es)

13

14     **Keywords:** *ddRAD sequencing, Gekkota, genomics, incipient species, speciation*

15

16 **Abstract**

17 With the advent of molecular phylogenetics, the number of taxonomic studies unveiling and  
18 describing cryptic diversity has greatly increased. However, speciation between cryptic  
19 lineages is often defined without evaluating population structure or gene flow, which can lead  
20 to false claims of species status and, subsequently, taxonomic inflation. In the present study  
21 we focus on the intriguing case of the Arabian gecko *Trachydactylus hajarensis* (Squamata:  
22 Gekkonidae), a species for which cryptic diversity has been previously reported. We  
23 generated mitochondrial data (12S rDNA) and genome-wide SNP data (ddRADseq) for 52  
24 specimens to determine phylogenomic relationships, population structure and gene flow  
25 within this species. Then, we applied species delimitation methods (SDMs) to evaluate  
26 several competing species hypotheses through the Multispecies Coalescent model. Results  
27 show that *T. hajarensis* is comprised by three well-defined lineages, two of them in the Hajar  
28 Mountains of eastern Arabia, and one in Masirah Island, in the southeastern coast of Oman.  
29 Even though high levels of past introgression and strong mitonuclear discordances were  
30 found, current gene flow is scarce with clear boundaries between populations and shallow  
31 levels of admixture in the contact zone between lineages. Surprisingly, species tree topology  
32 differed between methods and when different individuals were used in downsampled datasets.  
33 Conventional SDMs supported up to three putative new species within the group. However,  
34 after species validation with the genealogical divergence index (*gdi*), none of the putative  
35 species held. Overall, this study highlights the importance of sample choice, integrative  
36 analyses, and validation methods to not incur into taxonomic inflation, providing a set of  
37 already available tools to assess and validate population structure, gene flow, and SDMs  
38 before describing new species.

39

## 40        **1. Introduction**

41        Species are one of the fundamental units in biology. However, with more than 24 different  
42        definitions, the species concept is still a topic of debate, and sometimes dispute, in the  
43        scientific community (Mayden, 1997). Many authors agree that species are separately  
44        evolving metapopulations emerging from a speciation process (Fišer, Robinson, & Malard,  
45        2018) but, since speciation is intrinsically a gradual mechanism, discriminating populations  
46        from species remains a challenge. The inference of speciation events is achieved by attending  
47        to different lines of evidence such as reproductive isolation, morphological differentiation or  
48        monophyly (De Queiroz, 2007; Fišer et al., 2018). However, the advent of molecular  
49        phylogenetics and genomics has presented a new paradigm, reshaping the tree of life as we  
50        knew it. We have seen that phenotypic variation or the absence of gene flow alone do not  
51        always suffice to delimit species and, in many cases, species present signals of ancestral or  
52        current hybridization (Ivanov, Lee, & Mutanen, 2018). Moreover, the increase of molecular  
53        species delimitation studies in the last decade has revealed that cryptic diversity is much more  
54        common than previously thought (Chattopadhyay et al., 2016; Vences et al., 2022; Vilaça et  
55        al., 2021).

56               Cryptic species are entities that have undergone a speciation process but remain  
57        morphologically identical (Chan et al., 2020). Owing to the generalized use of molecular  
58        methods in most systematic studies, it has been shown that cryptic species are widely spread  
59        across most animal phyla (Derycke et al., 2008; Fennessy et al., 2016; Riaño et al., 2022;  
60        Vences et al., 2022). Some of the mechanisms that can lead to a lack of phenotypical variation  
61        between divergent lineages include early divergence or niche conservatism (Fišer et al.,  
62        2018), among others. Moreover, the description of cryptic diversity is shortening the Linnean  
63        shortfall and is of paramount importance for conservation efforts (Walters, Cannizzaro,

64 Trujillo, & Berg, 2021), since many species that were once thought to be homogeneous and  
65 widely distributed, actually represent complexes of cryptic species with sometimes  
66 endangered micro-endemic entities (Garcia-Porta, Simó-Riudalbas, Robinson, & Carranza,  
67 2017). However, the lack of a specific threshold to distinguish separate evolutionary lineages  
68 from populations of the same species raises another challenging question: where do we stop?  
69 The advent of next generation sequencing (NGS) and the development of new species  
70 delimitation methods (SDMs) have led to an outburst of taxonomic studies, especially in the  
71 case of non-model organisms (Ivanov et al., 2018). The amount of data that can be obtained  
72 through these techniques has massively surpassed the multi-locus approach and, in several  
73 cases, signals of population structure can be interpreted as species status with conventional  
74 SDMs, even when there is gene flow (Sukumaran & Knowles, 2017). This might result in  
75 over-splitting and taxonomic inflation, an issue especially problematic for conservation  
76 management, where limited resources have to be prioritized to the most endangered species  
77 (Isaac, Mallet, & Mace, 2004).

78         Nowadays, genomic SDMs are at the forefront of an ongoing debate in the scientific  
79 community (Jackson et al., 2017; Leaché et al., 2019; Sukumaran & Knowles, 2017). Within  
80 those, the Multispecies Coalescent (MSC) model (Rannala & Yang, 2003), extensively used  
81 with genomic data from closely related species, has been shown to capture population splits  
82 rather than species divergences (Leaché et al., 2019). This is especially problematic in  
83 allopatric populations where a lack of gene flow does not confirm pre- or postzygotic barriers  
84 but rather results from geographic isolation. To account for this, Jackson et al. (2017)  
85 proposed a heuristic criterion for species delimitation based on a genealogical divergence  
86 index (*gdi*) which afterwards was implemented in a Bayesian parameter estimation under the  
87 MSC model (Leaché et al., 2019). With this index, two lineages can be identified either as

88 two distinct species or as a single one, but it also includes a range of indecision that reflects  
89 the arbitrary nature of the species definition (Leaché et al., 2019).

90 In the past decades, molecular phylogenetics and the application of SDMs in  
91 traditionally neglected arid regions have proven that in such areas there are still high levels of  
92 undescribed diversity and many examples of cryptic species (Bray, Alagaili, & Bennett, 2014;  
93 Carranza et al. 2016; Main, van Vuuren, Tilbury, & Tolley, 2022; Simó-Riudalbas et al.,  
94 2017). Within the Arabian Peninsula, the Hajar Mountains rise as one of its most biodiverse  
95 regions, with high levels of reptile diversity and endemism (Burriel-Carranza, Els, &  
96 Carranza, 2022; Carranza, Els, & Burriel-Carranza, 2021; Šmíd et al., 2021). Its high and  
97 complex topography and the relatively low annual mean temperatures offer a spectrum of  
98 diverse niches which have already been the scenery of the origin of cryptic diversity (García-  
99 Porta et al., 2017; Simó-Riudalbas et al., 2017, 2018; Tamar, Mitsi, & Carranza, 2019).

100 Therefore, it is a well-suited ecological system to explore the nuances of the MSC model  
101 together with the new heuristic *gdi* with allopatric and early divergent species.

102 The ground-dwelling Arabian gecko *Trachydactylus hajarensis* (Arnold, 1980) is a  
103 species endemic to the Hajar Mountains and to Masirah Island, a small island situated 20 km  
104 off the eastern coast of Oman, but almost 200 km away from the closest continental *T.*  
105 *hajarensis* (Figure 1). Even though previous data suggest a natural colonization of the island  
106 instead of a human-mediated translocation (de Pous et al., 2016), the provenance of this  
107 island's population still remains unclear. Previous studies on this South Arabian endemic  
108 genus of only two species were carried out with multi-locus assemblies and most of the  
109 analyses were based on mitochondrial sequences alone (de Pous et al., 2016). Based on those  
110 results, *T. hajarensis* was suggested to be a species complex with at least three allopatric  
111 lineages: one in the Western and Central Hajars, a second in the Central and Eastern Hajars,

112 and another one in the easternmost side of the Hajar Mountains and in Masirah Island (de  
113 Pous et al., 2016). However, mitochondrial evolutionary history is not always linked to its  
114 nuclear counterpart, with common cases of mito-nuclear discordances across phyla (Marshall,  
115 Chambers, Matz, & Hillis, 2021; Shults et al., 2022). This stresses the need of revisiting this  
116 group's systematics with NGS techniques, which recover large portions or the complete  
117 nuclear genome and are key to determine whether there are mito-nuclear discordances,  
118 providing a comprehensive perspective of the evolutionary history of a species.

119 In the present work, we generate *de novo* genomic reduced representations of *T.*  
120 *hajarensis* to revisit the systematics of the group. We reconstruct the nuclear and  
121 mitochondrial phylogeny of *T. hajarensis* together with its sister species *T. spatalurus*,  
122 generate and test a series of species hypotheses applying the heuristic *gdi* and delimit the  
123 population structure and evolutionary history of this species, with a special focus on the  
124 colonization of Masirah Island.

125

## 126 **2. Materials & Methods**

### 127 **2.1. Sampling**

128 A total of 52 individuals of the genus *Trachydactylus* from 33 different localities were  
129 included in this study (Figure 1; Table S1). Specimens were collected between 2005 and 2017  
130 along all the known distribution range of *T. hajarensis*, containing representatives of all the  
131 Hajar Mountains' and Masirah Island's lineages. We also included four specimens of *T.*  
132 *spatalurus* from Dhofar, South Oman, that were used as outgroup (Table S1).

133

### 134 **2.2. Mitochondrial analyses**

135 We sequenced 35 specimens for the 12S rDNA (*12S*) and 15 additional samples were  
136 downloaded from GenBank. DNA extraction was done following the protocol in MacManes  
137 (2013) and PCR amplification conditions and primers used were the same as described in  
138 Metallinou et al. (2015). PCR products were purified and Sanger sequenced by MacroGen Inc.  
139 to obtain a 523 bp fragment of the mitochondrial gene *12S*. Sequences were aligned with  
140 Geneious 2021.1.1 (Biomatters Ltd.) and a Bayesian Inference (BI) phylogeny was  
141 reconstructed in BEAST2 v.2.6.4 (Bouckaert et al., 2019). We calibrated the deepest node in  
142 our phylogeny (the split between *T. hajarensis* and *T. spatalurus*) by extracting the mean  
143 height from a recently published squamate phylogeny (Tejero-Cicuéndez et al., 2022) and  
144 applying a normal distribution encompassing the 95% HPD intervals. We selected a  
145 HKY+G+X model with four gamma categories, base frequencies were estimated, and a  
146 relaxed clock LogNormal was used with a Calibrated Yule process tree prior. We conducted  
147 three independent runs of  $10^8$  generations sampling every 10,000 generations. Convergence  
148 was checked with Tracer v.1.5 (Rambaut & Drummond, 2013), a 40% burnin was applied and  
149 trees were summarized with TreeAnnotator v.2.6.4 (Bouckaert et al., 2019). Then, we  
150 objectively identified and delimited deep mitochondrial lineages using the general mixed  
151 Yule-coalescent model (GMYC; Fujisawa & Barraclough, 2013; Pons et al., 2006)  
152 implemented in the R package ‘splits’ (Ezard, Fujisawa, & Barraclough, 2021).

153

### 154 **2.3. Genomic DNA sequencing and processing**

155 Genomic libraries were produced following Peterson’s et al. (2012) protocol for double-digest  
156 restriction site-associated DNA (ddRADseq) for 52 specimens. In short, we double-digested  
157 500 ng of genomic DNA, using a pair of rare and common restriction enzymes (Sbf1 and  
158 Msp1, respectively). The resulting fragments were ligated with barcoded Illumina adapters.

159 Fragments were then size-selected for a range between 415 – 515 bp and sequenced on an  
160 Illumina NextSeq 500, for 75 bp single-end reads.

161 Raw Illumina reads were processed using Ipyrad v.0.9.62 (Eaton & Overcast, 2020)  
162 discarding sites with Phred score < 33, reads with more than three missing sites, consensus  
163 sequences with less than six reads, excessive heterozygous sites (more than three), or more  
164 than two haplotypes. After testing several configurations, both filtered reads and consensus  
165 sequences were clustered and aligned using an 89% clustering threshold. We set the minimum  
166 number of samples per locus to four to retrieve the maximum number of loci possible for  
167 post-processing filtering. Demultiplexed filtered reads for each individual can be found at  
168 Dryad (will be added in the published version).

169 Following recommendations from O’Leary et al. (2018), we applied an iterative  
170 filtering to identify and remove low quality samples and loci. We used Radiator (Gosselin,  
171 Lamothe, Devloo-Delva, & Grewe, 2017), Plink2 (Chang et al., 2015) and VCFr (Knaus &  
172 Grünwald, 2017) implemented in a custom script  
173 ([https://github.com/BernatBurriel/Post\\_processing\\_filtering](https://github.com/BernatBurriel/Post_processing_filtering)) to filter iteratively and  
174 alternatively SNP datasets. Values of missing data allowance ranged from 98% to 78% of  
175 missing genotype call rate and missing data per individual, decreasing 2% between iterations.  
176 Furthermore, we applied a hard threshold of missing genotype call rate depending on the  
177 dataset (Table S2), we removed non-biallelic SNPs, applied a minor allele frequency filter  
178 ( $maf < 0.05$ ) and removed monomorphic sites.

179 Dataset types varied between analyses but can be summarized into *loci* and *SNP*  
180 datasets: *loci* datasets were generated with ipyrad after removing all individuals that did not  
181 pass the previously explained filters and retaining only loci that were at least in 60% of all  
182 specimens. *SNP* datasets contained either concatenated SNPs or putatively unlinked SNPs. In



183 the latter only the SNP with the highest read depth of each locus was chosen. For further  
184 specifications in each dataset, refer to Table S2.

185

#### 186 **2.4. Population structure**

187 We used *dataset 1* (Table S2) to infer the population ancestry of each individual with  
188 ADMIXTURE v.1.3.0 (Alexander & Lange, 2011; Alexander, Novembre, & Lange, 2009).  
189 Ancestral populations ranged from K=1 to K=10, with 15 replicates for each K, and the best  
190 K value inferred after 15 cross-validation rounds. Then, we used the same dataset to perform  
191 a Principal Component Analysis (PCA) with Plink v2.00a2.3 (Chang et al., 2015). Finally, we  
192 used *dataset 2* (Table S2) for fineRADstructure (Malinsky, Trucchi, Lawson, & Falush, 2018)  
193 to further analyze *T. hajarensis*' population structure. This analysis unravels different levels  
194 of structure within and between populations and its robustness to missing data is optimal for  
195 non-model organisms (Malinsky, Trucchi, Lawson, & Falush, 2018). Results from all the  
196 former analyses were visualized with R v.4.2.1 (R Core Team, 2021).

197

#### 198 **2.5. Phylogenomic reconstructions**

199 We conducted the phylogenomic analyses using ML and BI on *dataset 3* (Table S2),  
200 including 5,219 loci and 47 individuals. With a concatenated dataset of all loci, we generated  
201 ML reconstructions with RAxML-ng v.1.0.2 (Kozlov et al., 2019) with a GTR+G model, a  
202 total of 100 starting trees (50 random and 50 parsimony) and 1,000 bootstrap replicates to  
203 estimate branch support. We also generated individual gene trees for each locus with IQ-  
204 TREE (Nguyen, Schmidt, von Haeseler, & Minh, 2015) with the best model obtained from  
205 ModelFinder (TPM3+F+R2), 100 trees and 1,000 ultrafast bootstraps. Then we generated a

206 consensus tree by summarizing all trees with Astral v.5.7.8 (Zhang, Sayyari, & Mirarab,  
207 2017).

208 We also estimated a time calibrated tree with BI implemented in BEAST2 v.2.6.4  
209 (Bouckaert et al., 2019) applying the same priors and specifications as in the mitochondrial BI  
210 approach (see methods section 2.2). In addition, we reconstructed with *dataset 3* the  
211 relationships of *T. hajarensis* using unrooted phylogenetic networks implemented in  
212 SplitsTree v.4.18.3 (Huson & Bryant, 2006) with the Neighbor-Net algorithm.

213

## 214 **2.6. Coalescent-based Species Trees**

215 Based on the population structure (Figure 2) and phylogenomic reconstruction (Figure 3)  
216 analyses, we identified up to four well-defined monophyletic groups within *T. hajarensis*.  
217 These groups can be geographically divided into Western Hajars lineage, Central Hajars  
218 lineage, Eastern hajars lineage and Masirah Island lineage (Figure 1). We estimated a species  
219 tree of the aforementioned lineages together with *T. spatalurus* to evaluate the evolutionary  
220 relationships between these groups in the Multispecies Coalescent framework. The resulting  
221 tree was then used as a guide tree for species delimitation methods (see methods section 2.8).  
222 Since species delimitation and species tree inference tend to be computationally demanding, it  
223 is common practice to downsample datasets to one or two specimens per lineage (e.g. Tonzo,  
224 Papadopoulou, & Ortego, 2019). To test the effect of taxon choice when producing reduced  
225 datasets, we generated four datasets with different specimen configurations that did not  
226 present any signals of admixture between lineages (see Table S2 for further details); *T.*  
227 *spatalurus* was used to root the phylogenetic trees: i) *dataset 4 SNAPP/BPP*: two specimens  
228 with the highest coverage from Western, Central, Eastern, and Masirah Island lineages and  
229 two specimens of *T. spatalurus*; ii) *dataset 5 SNAPP/BPP*: two specimens from Western,

230 Central, Eastern, and Masirah Island lineages and two specimens of *T. spatalurus*; Eastern  
231 lineage specimens selected from the closest geographic region to the Masirah Island lineage  
232 (CN10775-26 and CN10791-26); iii) *dataset 6 SNAPP/BPP*: two specimens from Western,  
233 Central, Eastern, and Masirah Island lineages and two specimens of *T. spatalurus*; Eastern  
234 lineage specimens selected from the farthest geographic region to the Masirah Island lineage  
235 (S7150-22 and CN686-23); vi) *dataset 7 SNAPP/BPP*: four specimens from Western, Central,  
236 Eastern, and Masirah Island lineages and four specimens of *T. spatalurus*; Eastern lineage  
237 specimens selected from all its geographic range (S7150-22, S7161-24, CN4226-26 and  
238 CN10775-26). For further information on the selected specimens and dataset specifications  
239 refer to Tables S1 and S2.

240 Time-calibrated species trees for each of the four datasets above were inferred with  
241 SNAPP v.1.5.2 (Bryant et al. 2012) twice. First, we generated a time-calibrated species tree  
242 with SNAPP using the ‘snapp\_prep.rb’ script (<https://github.com/mmatschiner/tutorials>). We  
243 dated the deepest node in the phylogeny as suggested by Stange et al. (2018) with a normal  
244 distribution from the mean age extracted from Tejero-Cicuéndez et al. (2022). Mutation rates  
245 ( $u$  &  $v$ ) were fixed to 1, and a uniform distribution was set for the population mutation rate  
246 theta ( $\theta$ ) with default boundaries (0-1,000) and was constrained to be identical on all  
247 branches. The latter prior is assumed by the script ‘snapp\_prep.rb’ to decrease the  
248 computational load of the analysis (Stange et al., 2018). We also repeated the same analysis  
249 without linking population mutation rates and applying specific Yule ( $\lambda$ ) and Theta priors ( $\theta$ ;  
250 see Coalescent-based Species Delimitation below). In both approaches we ran 4 independent  
251 runs of 3,000,000 generations, sampling every 50 generations. Convergence between runs and  
252 stationarity was checked with Tracer v.1.7 (Rambaut & Drummond, 2013). Posterior  
253 distributions were combined with LogCombiner v.2.6.3, discarding 30% of the posterior trees

254 as burn-in and a maximum clade credibility tree was obtained calculating median heights in  
255 TreeAnnotator v.2.6.3 (BEAST2 v.2.6.4; Bouckaert et al., 2019).

256 In addition, we generated species tree estimations for *dataset 4 BPP* to *dataset 7 BPP*  
257 (Table S2) with BPP A01 analysis (Flouri, Jiao, Rannala, & Yang, 2018). We followed the  
258 pipeline of Huang (2018) ([https://github.com/airbugs/Dynastes\\_delimitation](https://github.com/airbugs/Dynastes_delimitation)) to estimate  $\theta$   
259 and  $\tau$  priors ( $a=3$ ,  $b=0.061$  and  $a=3$ ,  $b=0.131$  respectively), and produced a dataset where all  
260 loci were present in at least one individual of each lineage. Then, we implemented three  
261 independent runs of 500,000 generations sampling every 10 generations after a burn-in of  
262 50,000.

263 Finally, we generated a ML species tree with *dataset 3* (Table S2) . We followed the  
264 same procedure in IQ-TREE (Nguyen et al., 2015) as in Methods 2.5 but when summarizing  
265 all the trees with Astral v.5.7.8 (Zhang et al., 2017) we assigned each individual to its group  
266 as inferred by ADMIXTURE.

267

## 268 **2.7. Species tree topology testing**

269 As shown in results section 3.3.2, our coalescent-based species trees recovered two different  
270 topologies: the first topology (from now on *Topo1*) separates *T. hajarensis* into two clades:  
271 the first conformed by Western and Central Hajars' lineages, and the other by Eastern Hajars  
272 and Masirah Island's lineages. The second topology (from now on *Topo2*) places all Hajar  
273 Mountains' lineages as a clade sister to Masirah Island's. Both trees were rooted with *T.*  
274 *spatalurus*. We evaluated both topologies by implementing the recently published mixture  
275 across sites and trees (MAST) model (Wong et al., 2022). In short, this program calculates  
276 topology weights for a number of given topologies (two in our case) across an alignment,  
277 calculates the most supported topology at each site, and returns an overall value for the whole

278 alignment (determined by a topology weight ranging between 0 and 1). We generated a  
279 MAST analysis for each polymorphic loci present in each quintet of specimens containing  
280 one individual from all *T. hajarensis* lineages (Western, Central, Eastern and Masirah) and  
281 one individual of *T. spatulurus*. There were a total of 37,800 quintets which contained, on  
282 average,  $537 \pm 141$  loci extracted from *dataset 3* (Table S2). Then, we ran MAST  
283 independently for each loci ( $19.35 \times 10^6$  different MAST analyses) giving the aforementioned  
284 topologies as input trees and unlinking substitution models, DNA frequencies and gamma  
285 model across trees.

286 Resulting overall tree weights for each loci were extracted, weights not supporting either  
287 of the given topologies with a probability above 0.55 were discarded, and the resulting  
288  $3.96 \times 10^6$  weights were summarized by specimen and quintet independently. We identified the  
289 most supported topology for each specimen by averaging the number of loci between all  
290 quintet combinations where a specific specimen was present. When grouping our results by  
291 quintet, we implemented a linear model to identify up to which point distance to the putative  
292 contact zone (distance to Central Hajars in *Topo1*, and distance to Masirah in *Topo2*)  
293 explained the observed shifts in topology weights. We calculated euclidean distances between  
294 all Eastern vs Masirah Island and Eastern vs Central Hajars specimens and accounted for all  
295 quintet combinations where Eastern and Masirah/Central specimens remained identical in two  
296 different ways: On the one hand, we obtained a single topology weight for each locality by  
297 averaging all pseudoreplicates. On the other, we accounted for all pseudoreplicates  
298 implementing a nested analysis of variance.

299

## 300 **2.8. Coalescent-based Species Delimitation**

301 In the present work, we use the General Lineage Species Concept (de Queiroz,2007). This  
302 unified species concept considers species as separately evolving meta-population lineages and  
303 treats this property as the single requisite for delimiting species. We consider continuously  
304 distributed populations that show contemporary gene flow and no other notable forms of  
305 divergence to be a metapopulation lineage of the same species (Chan et al., 2020). Other  
306 properties, such as phenetic distinguishability, reciprocal monophyly, and pre- and  
307 postzygotic reproductive isolation, are not part of this species concept but serve as important  
308 lines of evidence relevant to assess the separation of lineages and therefore species status (de  
309 Queiroz, 2007).

310 We designed and tested several coalescent-based species delimitation models by  
311 splitting or lumping the previously inferred *T. hajarensis* lineages. Specifically, our species  
312 delimitation hypotheses included: *i*) Single-species hypothesis ( $H_0$ ); *ii*) Two species within *T.*  
313 *hajarensis* ( $H_1$ : Western+Central vs Masirah + Eastern lineages); *iii*) Three-species hypothesis  
314 ( $H_2$ : Western + Central vs Eastern vs Masirah lineages); and *vi*) All lineages as distinct  
315 species ( $H_3$ : Western vs Central vs Eastern vs Masirah lineages). Species delimitation analyses  
316 were tested with Bayes factor delimitation (BFD\* with genomic data; Leaché et al. 2014)  
317 implemented in BEAST2 v.2.6.4 (Bouckaert et al., 2019), and with BPP A10 analysis (Yang  
318 & Rannala, 2010).

319 Within BFD\*, we estimated for each model a species tree with SNAPP v.1.5.2 (Bryant  
320 et al., 2012) and conducted a path sampling analysis to estimate and rank marginal likelihoods  
321 between models. We then computed Bayes Factors (BF) to determine the best SDM. Since  
322 SNAPP is computationally intensive and assumes no gene flow between species, we selected  
323 2 non-admixed individuals from each species hypothesis (*dataset 4 SNAPP*; Table S2). We  
324 also included representatives of its sister species *T. spatulurus* to account for *T. hajarensis*

325 being a single species, resulting in a dataset of 10 individuals and 2,147 unlinked SNPs.  
326 Mutation rates ( $u$  &  $v$ ) were fixed to 1. We set the Yule prior ( $\lambda$ ) to a gamma distribution and  
327 while alpha was set to 2, beta was estimated by calculating the expected tree height on the  
328 5,219 loci dataset (maximum observed divergence between any pair of taxa divided by 2). We  
329 then used ‘pyule’ (<https://github.com/joaks1/pyule>) to determine the mean value of lambda  
330 and calculated beta accordingly ( $\lambda = \alpha \times \beta$ ). Theta prior ( $\theta$ ) was also set to a gamma  
331 distribution and the mean value of  $\theta$  was estimated by averaging all genetic distances within  
332 each lineage. Path sampling analyses were run for 20 steps with the following parameters:  
333 500,000 MCMC generations sampling every 1,000, with an alpha of 0.3, 10% burnin and a  
334 pre-burnin of 50,000. Stationarity of all runs was checked and each step was run until ESS  $\geq$   
335 200.

336 We implemented further guided species delimitation analyses with BPP v.4.4.1  
337 (Rannala & Yang, 2013; Yang & Rannala, 2010). We used *dataset 4 BPP* which contained  
338 the same individuals as in BFD\* (Table S2), used the best species tree topology (*Topo1*; see  
339 results 3.4) as the guide tree, and processed the dataset as described above (see methods 2.6).  
340 Then, we implemented three independent runs of BPP A10 species delimitation (Yang &  
341 Rannala, 2010) with 1,000,000 generations, sampling every 10 generations after a burn-in of  
342 100,000.

343

## 344 **2.9. Species validation**

345 To test the robustness of our inferred species, we calculated the genealogical  
346 divergence index (*gdi*) proposed by Jackson et al. (2017), and implemented within BPP by  
347 Leaché et al. (2019). The equation for *gdi* is  $1 - e^{-2\tau_{AB}/\theta_A}$ , where  $\tau$  represents the divergence  
348 time between species *A* and *B* and  $\theta$  represents the population size of the species *A*. Therefore,

349 to effectively test species status for two given taxa this index has to be calculated reciprocally  
350 between taxa *A* and *B*. According to Jackson et al. (2017), low *gdi* values ( $gdi < 0.2$ ) indicate  
351 that *A* and *B* are the same species while high values ( $gdi > 0.7$ ) support a distinct species  
352 status of the two taxa. Values in between are considered ambiguous, lacking the support  
353 necessary to be classified as distinct species.

354 We implemented this index to the two competing species tree hypotheses (See results  
355 3.3.2). We ran A00 analyses with *dataset 4 BPP* (Table S2) estimating the parameters on the  
356 inferred guide trees (*Topo1* and *Topo2*) to generate the posterior distributions for the most  
357 recent species divergences, and then we collapsed those tips and repeated the analysis to test  
358 species status for the lumped lineages (see Leaché et al., 2019 for a similar approach). Three  
359 independent runs of A00 were performed for 100,000 generations, sampling every five  
360 generations after a burn-in of 10,000. We calculated and visualized *gdi* indexes with R v.4.2.1  
361 (R Core Team, 2022).

362

## 363 **2.10. Introgression analysis**

364 We used the D-Statistics (ABBA-BABA tests) implemented in Dsuite (Malinsky, Matschiner,  
365 & Svardal, 2021) to test for past signals of introgression between *T. hajarensis* lineages. To  
366 do so, we considered four *T. hajarensis* lineages (as supported by BFD\* analysis) and  
367 performed the analysis providing both *Topo1* and *Topo2* respectively. In all analyses, *T.*  
368 *spatalurus* was used as outgroup. Finally, we calculated the f-branch statistics to infer the  
369 excess of shared derived alleles between lineages.

370

## 371 **3. Results**

### 372 **3.1. ddRADseq data processing**



373 Total reads obtained from sequencing added up to  $11.6 \times 10^7$  and after applying quality filters  
374 more than 97% of the raw reads remained, with an average of  $2.1 \times 10^6$  reads per individual.  
375 Post-processing filtering identified up to five individuals with low coverage levels, which  
376 were discarded from subsequent analyses. The number of loci within *loci* datasets ranged  
377 between 30,526 to 4,441 loci, and *SNP* datasets contained between 30,096 and 2,428 SNPs,  
378 depending on the number of individuals used, and the applied filters for each analysis. See  
379 Table S2 for further information on each dataset.

380

### 381 **3.2. Population structure**

382 We explored the population structure of *T. hajarensis* with *dataset 1* (Table S2), which  
383 contained 2,428 unlinked SNPs present in at least 60% of all individuals (missing genotype  
384 call rate set to 40). The most likely number of ancestral populations recovered from  
385 Admixture was  $K=3$  (cross-validation = 0.43). This configuration geographically segregates  
386 *T. hajarensis* into Western + Central Hajars, Eastern Hajars, and Masirah Island, with almost  
387 no signal of gene flow between them. Lower  $k$  numbers lumped together Masirah and Eastern  
388 lineages and higher  $k$  numbers split the occidental clade into the Central and Western lineages  
389 (Figure 2a & b, Figure S1). Similar results were obtained with the Principal Component  
390 Analysis (PCA), which also segregated *T. hajarensis* into the three aforementioned clusters.  
391 Interestingly, all continental lineages clustered closer together than to the Masirah Island  
392 group (Figure 2c).

393 To further inspect its population structure, we implemented fineRADstructure to  
394 *dataset 2* (Table S2). Results again show a clear structure into three groups, being Masirah  
395 Island the cluster sharing the highest number of haplotypes between its specimens (up to  
396 1,110; Figure 2d). Surprisingly, the Eastern lineage showed high levels of coancestry with

397 both Masirah Island and Western + Central lineages, suggesting a shared evolutionary history  
398 with both of them. Such coancestry was stronger in specimens that were geographically  
399 closer to either Masirah Island (localities 25 and 26) or the Central Hajars (localities 19 to  
400 21). This can be clearly appreciated at the crossroads between the Central and Eastern  
401 lineages where we find an individual (CN3750-19; Figure 2d) that almost shares the same  
402 coancestry with either Central and Eastern lineages, most likely representing a hybrid  
403 between them (Figure 2d). Finally, the phylogenomic network also shows the presence of all  
404 three lineages and, even though the Eastern Hajars are more related to Masirah, there are  
405 some reticulation events that approximate both Central and Eastern groups (Figure 2e).

406

### 407 **3.3. Phylogenetic reconstructions**

#### 408 **3.3.1. Mitochondrial tree reconstruction**

409 The phylogeny reconstructed with the *12S* mitochondrial gene (Figure 3a) is concordant with  
410 the results shown in de Pous et al. (2016) with most of the Hajar Mountain's lineages forming  
411 a monophyletic group (localities 1–24). In this group, there are two main lineages: the first  
412 lineage spans from the Musandam Peninsula southwards into the westernmost part of the  
413 Central Hajars (localities 1–16), and the second is formed by the specimens inhabiting the  
414 Central and most of the Eastern Hajars (localities 17 – 24). However, not all *T. hajarensis*  
415 inhabiting the Hajar Mountains cluster together, since the two easternmost localities  
416 (localities 25 and 26 in Figure 1) were recovered as sister group to the specimens in Masirah  
417 Island (Figure 3a).

418

#### 419 **3.3.2. Phylogenomic reconstructions and topological discordances**

420 All phylogenomic reconstructions were discordant with the mitochondrial phylogeny and,  
421 overall, they show a clear geographical structure with three distinct lineages in the Eastern,  
422 Central, and Western Hajars. However, we recovered different topologies regarding the  
423 position of Masirah Island's lineage and the phylogenomic relationships between the  
424 aforementioned groups. The concatenation-based BI approach recovered Masirah Island and  
425 Eastern Hajars lineages as reciprocally monophyletic (Figure 3b). A very similar topology  
426 was obtained with the summarized ML phylogeny (Figure S2) with the exception of the  
427 specimen CN3750-19, that was recovered as basal to both Masirah Island and Eastern Hajars  
428 lineages, and which most likely represents a hybrid specimen between Central and Eastern  
429 lineages (Figure 2d). Finally, concatenation-based ML approaches placed Masirah Island's  
430 lineage within the Eastern lineage (Figure S2). All the above support a Western + Central  
431 clade as sister to an Eastern + Masirah clade.

432 Two species tree topologies were recovered across all species tree reconstruction  
433 methods (Figure S3). The first follows the same topology obtained with BI and yields a  
434 Western + Central clade sister to an Eastern + Masirah clade (*Topo1*). The second topology  
435 places all Hajar Mountains' *T. hajarensis* as a monophyletic group sister to the Masirah Island  
436 lineage (*Topo2*), and was recovered in three SNAPP and one BPP species tree analyses  
437 (Figure S3). Both topologies are supported with a posterior probability of 1 in all nodes in at  
438 least one analysis (Figure S3).

439

#### 440 **3.4. Species tree topology testing**

441 Between the two competing species tree hypotheses, *Topo1* was consistently recovered as the  
442 best topology for almost all specimens and quintets. Only three specimens near the contact  
443 zone between Central and Eastern Hajar's populations presented low to negative number of

444 loci supporting *Topo1* (CN3750-19, OM04\_2010\_66-20 and OM04\_2010\_99-21; Figure 4a),  
445 and it is noteworthy that in the best Admixture scenario only one of the three specimens  
446 (CN3750-19) was recovered as admixed (Figure 2a).

447         Splitting our dataset into quintets allowed us to investigate the effects of past gene  
448 flow in the observed topology of *T. hajarensis*. When evaluating topology weights through a  
449 geographic gradient (either distance between Eastern Hajars and Masirah Island's specimens  
450 in Figure 4b, or distance between Central Hajars and Eastern Hajars' specimens in Figure 4c)  
451 we saw that support for *Topo1* decreased when Eastern Hajars and Masirah Island's  
452 specimens were farther apart (Figure 4b), and when Central and Eastern Hajar's specimens  
453 were closer together (Figure 4c). Both geographic gradients significantly explain the shifts in  
454 topology weights ( $p$ -value  $\ll 0.01$ ; Figure 4b,c) and point towards the same direction, a shift  
455 from *Topo1* to *Topo2* in the Central/Eastern contact zone. Distance between Central Hajars  
456 and Eastern Hajars' specimens explained much better the observed topology weights ( $R^2 =$   
457  $0.82$ ; Figure 4c) than distance between Eastern Hajars and Masirah Island's specimens ( $R^2 =$   
458  $0.33$ ; Figure 4b), which is concordant with *Topo1* representing the *true* evolutionary history  
459 of *T. hajarensis*. Altogether, results suggest that *Topo2* is the result of a secondary contact  
460 between Central and Eastern lineages. The gradual higher support of *Topo2* when Eastern  
461 Hajars' specimens are closer to the Central Hajars instead of a clear-cut shift in the contact  
462 zone could be indicative of past dispersals of Central Hajars' specimens into the Eastern  
463 block, leaving a genomic footprint in the nowadays Eastern Hajars' populations.

464         Pseudoreplicate or sample choice (different Western Hajars and Central Hajars  
465 samples for each distance between Eastern vs Masirah Island's specimens; Figure S4a;  
466 different Western Hajars and Masirah Island samples for each distance between Central vs  
467 Eastern Hajars' specimens; Figure S4b) was recovered as significant but with less power than

468 distance between Eastern Hajars and the Masirah Island (Table S3) or Central Hajars’  
469 specimens (Table S4). This means that if we downsample our dataset and select far enough  
470 Eastern and Central Hajars’ specimens, we will obtain *Topo1* regardless of the other samples  
471 in the quintet. However, if we select geographically close Eastern and Central Hajars’  
472 specimens, we can obtain either *Topo1* or *Topo2* in our resulting species tree, depending on  
473 the other Western Hajars and Masirah Island samples selected (Figure S4).

474

### 475 **3.5. Species delimitation, species validation and signals of introgression**

476 Based on results from our population clustering and structure analyses, we tested up to 4  
477 lineages (Western, Central, Eastern and Masirah) as new putative species selecting only non-  
478 admixed individuals. BFD\* supported the species status for all four putative species with a  
479 decisive strength of support ( $\ln(\text{BF}) > 5$ ; Kass & Raftery, 1995; Table S5). Contrastingly,  
480 species delimitation analysis conducted with BPP supported the split of only three new  
481 putative species, lumping the Western and Central lineages into a single species (species  
482 delimitation model  $H_2$  supported with a posterior probability of 0.95).

483         The heuristic genealogical divergence index (*gdi*) was implemented on *dataset 4 BPP*  
484 (Table S2), and similar results were recovered among both species tree topologies (Figure 4).  
485 First, *T. hajarensis* was compared to *T. spatulurus* to test the robustness of the current  
486 systematics on the group and results supported both species as distinct from each other with  
487 *gdi* values well above the 0.7 threshold (Figure 5c and Figure S5c). In contrast to the species  
488 delimitation models, comparisons between Hajar Mountain’s lineages did not support, in any  
489 case, the species status of these lineages, with *gdi* values falling either below 0.2 or within the  
490 ambiguous range. Masirah Island’s group presented a *gdi* above 0.9 which would support the  
491 species status of Masirah with respect to its sister group. Incongruently, Masirah’s sister

492 lineage (either the Eastern Hajars lineage or the clade comprising all the Hajar Mountains' *T.*  
493 *hajarensis*, depending on the topology) is not supported as a distinct species from Masirah  
494 ( $gdi = 0.19 \pm 0.01$  in Figure 5c, and  $gdi = 0.35 \pm 0.09$  in Figure S5c, respectively).

495 Tests of introgression were implemented through D-statistics applied to the SNPs  
496 extracted from *dataset 3* (30,096 SNPs). When *Topo1* was given as a guide tree, statistically  
497 significant introgression was revealed between the Eastern and the Central lineages (Figure  
498 5b). Otherwise, when *Topo2* was forced, significant past introgression was recovered between  
499 Eastern and Masirah Island lineages (Figure S5b).

500

## 501 **4. Discussion**

### 502 **4.1. A highly structured species with past or recent gene flow**

503 Our genomic analyses show that *T. hajarensis* is comprised by three well-defined lineages  
504 geographically located in the Western + Central Hajar Mountains, the Eastern Hajar  
505 Mountains, and in Masirah Island, respectively. However, the phylogenetic relationships of  
506 these lineages differ between methodologies showing high levels of mito-nuclear discordance  
507 (Figure 3) and introgression between either Central Hajars and Eastern Hajars lineages  
508 (Figure 5b), or Eastern Hajars and Masirah Island lineages (Figure S5b). The mitochondrial  
509 phylogenetic reconstruction showed a widely spread Central Hajars' lineage including most  
510 of the Eastern Hajars, with only the easternmost region of the Hajar Mountains, near Ra's al  
511 Hadd, being sister to the Masirah Island's group (Figure 3). Incongruently, none of our  
512 nuclear genomic analyses recovered this topology, with a clear divergence between Central  
513 and Eastern lineages in the region surrounding the Semail gap (localities 19 to 21), a well-  
514 known topographic feature that has already been used to delimit the separation between the  
515 Eastern and Central Hajars (Garcia-Porta et al., 2017). Moreover, population structure

516 analyses showed almost no signals of admixture between Central and Eastern populations  
517 (Figure 2a, b & c). However, when inspecting the fineRADstructure results (Figure 2e), the  
518 Eastern lineage appeared as greatly substructured, with an increasing gradient of shared  
519 alleles when geographically closer to the Central Hajars. This substructure may be caused by  
520 the habitat and climatic heterogeneity, and the complex topography of the Hajar Mountains  
521 (Burriel-Carranza et al., 2019; Carranza et al., 2018), which could be hindering panmixia  
522 within the group. The increasing gradient of coancestry observed in fineRADstructure also  
523 suggests a secondary contact between either the Eastern and Masirah lineages, or the Eastern  
524 and Central lineages, which was resolved by our MAST analysis (Figure 4). The MAST  
525 model recovered Masirah Island's lineage as sister to the Eastern lineage and showed that the  
526 topology where all Hajar Mountains' lineages form a monophyletic group (*Topo2*) is most  
527 likely a product of a secondary contact between Eastern and Central specimens, having a  
528 strong signal in the contact zone and gradually fading out with distance. The lack (or low  
529 levels) of current admixture between Eastern and Central specimens suggest that the observed  
530 patterns are a result of past secondary contacts or dispersal events from the Central Hajars  
531 towards the Eastern Hajars, leaving genomic evidence of nuclear and mitochondrial  
532 introgression between lineages.

533 Our D-statistic analysis points out that, among the number of processes leading to  
534 conflicts between mitochondrial and nuclear genomes, introgression might be responsible for  
535 the observed discordance in this case. Since the mitochondrial genome is maternally inherited  
536 and does not segregate or recombine, introgression events can incorporate a complete foreign  
537 mitochondrial genome into a population and maintain it over long periods of time, resulting  
538 into extremely diverged haplotypes between specimens from the same population but from

539 differently-inherited mitochondrial genomes. Moreover, the lack (or low levels) of current  
540 nuclear admixture between Central and Eastern lineages support a past hybridization event.

541

#### 542 **4.2. Caveats of downsampling individuals when building species trees**

543 The high computational resources needed to infer species trees with NGS data commonly  
544 leads to a dataset downsampling, selecting only some individuals for such analyses  
545 (Dufresnes et al., 2020; Kornilios et al., 2019; Thanou, Kornilios, Lymberakis, & Leaché,  
546 2020). Moreover, since SNAPP does not assume gene flow, specimens are usually selected  
547 using population structure tools such as ADMIXTURE, with the assumption that any  
548 specimen from the same lineage species that is not admixed with other lineages should  
549 coalesce first within its group. Here, we provide an example where, even though discarding  
550 individuals with admixed proportions of their genomes, sample selection can greatly influence  
551 the topology and branch lengths of the resulting trees. It is especially worrying the case of the  
552 specimen OM04\_2010\_66-20, which even though it is not recovered as admixed in the best K  
553 of ADMIXTURE, it contains more loci supporting the hybrid topology (*Topo2*; Figure 4) than  
554 the *true* topology (*Topo1*; Figure 4). While most of the reconstructed species trees support  
555 *Topo1*, there are some cases where *Topo2* has higher node support (Figure S3).

556 In this case, several particular effects or the combination of them might be promoting  
557 such incongruent results. On the one hand, biological effects such as the small population size  
558 of Masirah Island, or the introgression between Eastern and Central+Western lineages might  
559 be confounding species tree estimation analyses. On the other hand, operational effects such  
560 as the usage of SNAPP linking all population sizes, a common feature used to reduce model  
561 parameters and achieve feasible run times (Stange et al., 2018) seems to be promoting a  
562 topology where Masirah Island is sister to the rest of the Hajar Mountains' *T. hajarensis*



563 (Figure S3a, c and d), while the same analyses unlinking population sizes recover a clearly  
564 distinct topology.

565 Overall, our study suggests that specimen selection when downsampling datasets for  
566 species tree estimation should be proceeded with caution, especially if there are signs of  
567 recent or past gene flow or different population sizes between taxa. Therefore, downsampled  
568 datasets should not include specimens near contact zones and, if possible, include specimens  
569 spanning throughout the whole distribution of each taxon.

570

### 571 **4.3. One, two or three species? Importance of validation in species delimitation methods**

572 Our analyses applying a variety of species delimitation methods yielded different results.  
573 Mitochondrial-based GMYC supports *T. hajarensis* to be a complex of five species, BFD\*  
574 supports four species and BPP three. If we consider the integrated results of BFD\* and BPP,  
575 both support the split of Western+Central, Eastern and Masirah as three distinct species. Such  
576 species would fall within the spectrum of cryptic species, since even though they are  
577 genetically identifiable there are no obvious distinctive phenotypic traits between them (de  
578 Pous et al. 2016; S.C. pers. observ.). Contrastingly, when using an heuristic criterion to  
579 validate species status (the *gdi*) none of the putative species was fully recovered as a distinct  
580 species (Figure 5c). The ambiguous results between Masirah Island's lineage and its  
581 respective sister group are most likely due to a stated weakness of the *gdi* which, in the case  
582 of populations founded by a small number of individuals or in cases where two lineages have  
583 very different population sizes, results may lead to claims of species status even if the groups  
584 diverged very recently (Leaché et al., 2019). Our results support a single colonization event of  
585 Masirah Island and the high number of shared alleles between specimens also suggests that  
586 this population was founded by few individuals. Considering the different population sizes

587 with its sister group and the low values of *gdi* of its counterpart test (Figure 5c), we identify  
588 Masirah Island's specific status claim as a false positive. Validating SDMs has proven crucial  
589 to not contribute to taxonomic inflation in *T. hajarensis* and we suggest that, together with an  
590 in-depth exploration of population structure and gene flow, the *gdi* (or any other similar  
591 heuristic method) should become a key tool in species delimitation validation, specially when  
592 testing the species status of allopatric early divergent lineages (Leaché et al., 2019).

593

#### 594 **4.4. Systematics and Biogeography**

595 The present study shows that *T. hajarensis* is formed by three well supported lineages with a  
596 complex and dynamic evolutionary history. The first divergence within the species separated  
597 the *T. hajarensis* currently inhabiting the Western and Central Hajar Mountains from the *T.*  
598 *hajarensis* on Masirah Island and the Eastern Hajars. The split between these clades is  
599 estimated around Early to Mid-Quaternary (1.4 my; 0.7-2.13 mya HPD95%; Figure 5), setting  
600 the first diversification within the group about three million years after previous estimations  
601 using mitochondrial markers (de Pous et al., 2016; Figure 3). Given the distribution of the  
602 different lineages we can assume that they speciated through allopatric isolation, probably  
603 caused by a combination of past geographical and climatic events. Interestingly, Western +  
604 Central Hajars lineage and Eastern hajars lineage are found nowadays in allopatry in the same  
605 mountain range (Figure 1). However, the introgression signal recovered between the two  
606 lineages and the mitochondrial phylogeny suggest that at some point they cohabited and gene  
607 flow between lineages occurred. This could indicate that the Eastern lineage colonized the  
608 Hajar Mountains posteriorly to the Western + Central clade and progressively displaced the  
609 Western + Central populations to its current distribution exchanging genes in the process.  
610 Another explanation would be that Western + Central populations in the Eastern Hajars  
611 merged with the arriving Eastern lineage and the high topography of the Central Hajars

612 hindered the dispersal and complete fusion of both lineages into one. There are other  
613 examples where genetic isolation is found between lineages in the Eastern and Central Hajars  
614 (Carranza & Arnold, 2012; Garcia-Porta et al., 2017) and in the case of the geckos of the  
615 genus *Asaccus*, it has even led to the description of a new species (Simó-Riudalbas et al.,  
616 2018). Overall, we can speculate that even though currently there is low gene flow between  
617 lineages, genetic barriers are diffuse and, if at some point climatic conditions favor increased  
618 dispersal of this ground-dwelling species, both groups could eventually fuse back into one.

619 In the Arabian Peninsula, Pliocene and Quaternary climatic shifts between humid and  
620 arid to hyper-arid episodes have resulted from repeated high-latitude glacial events and global  
621 sea level falls, promoting desert formation (Glennie, 1998). In southeastern Oman, we find  
622 the Sharqiyah Sands, a sand dune desert where *T. hajarensis* has never been reported and  
623 which separates the Masirah's lineage by roughly 200 km in a straight line to its closest sister  
624 group in the Eastern Hajars (Figure 1). This desert is thought to be a result of Late Quaternary  
625 climatic shifts in southeast Arabia (although see Metallinou & Carranza, 2013) and its  
626 formation is linked to the onshore-blowing SW Monsoon (Glennie, 1998) with prior fluvial  
627 deposits dating back to the Plio-Pleistocene and first aeolian sands consolidating about  
628 160,000 years ago (Radies, Preusser, Matter, & Mange, 2004). The divergence between  
629 Masirah and Eastern lineages dates to 1.1 mya (0.5 – 1.6 mya HPD95%; Figure 5), a time  
630 range prior to the consolidation of the Sharqiyah Sands. This would be coherent with a broader  
631 historic distribution range of *T. hajarensis* encompassing the current region where today the  
632 Sharqiyah Sands reside. This would have facilitated colonization by adrift specimens or  
633 clutches, since Masirah Island is only about 20 km from the closest continental shore.  
634 Moreover, sea level drops of up to 130 m induced by high-latitude glacial events were  
635 recurrent during the Plio-Pleistocene (Glennie, 1998). The greatest depth between Masirah

636 Island and the coast of Oman rarely surpasses 50 m, thus such sea level drops could have  
637 provided a land bridge between Masirah Island and the continent, facilitating land dispersal of  
638 *T. hajarensis* and other reptile species towards the Island. Phylogenomic reconstructions and  
639 population structure analyses support a single colonization event of Masirah Island from few  
640 founder individuals, with all specimens constituting a monophyletic group (Figure 3b) with  
641 high levels of coancestry among them (Figure 2d). These results, together with the increased  
642 sampling effort throughout several localities in the island, are in agreement with previous  
643 findings (de Pous et al., 2016), and also advocate for a natural colonization of Masirah Island  
644 in contrast to a human mediated introduction.

645

## 646 **5. Conclusions**

647 Overall, *T. hajarensis* seems to be conformed by a single, highly-structured species. The  
648 usage of genomic techniques has proven vital to determine the population structure,  
649 introgression events, and mito-nuclear discordances within this system, but further studies  
650 with whole genome sequencing data might be necessary to fully understand the regions of  
651 introgression within the species. Moreover, although NGS and the MSC are essential tools to  
652 shorten the Linnean Shortfall and are well suited to uncover cryptic diversity, we show that  
653 dataset downsampling and species delimitation methods need to be cautiously implemented  
654 and validated to avoid contributing to taxonomic inflation. Altogether, this system offers the  
655 rare possibility to witness both possible evolutionary outcomes of an incipient species at the  
656 same time. On the one hand, if isolation is maintained between continental and Masirah  
657 Island's populations, both lineages will most likely evolve into different species. On the other  
658 hand, its sister lineage could potentially merge back with the other Hajar Mountain's *T.*  
659 *hajarensis*, dissolving almost 1.5 my of independent evolution. However, only time will tell.

660 **Author's contributions**

661 BB-C and SC conceived and designed the study. BB-C and ME performed laboratory work,  
662 analyzed the data and wrote the manuscript with input from all other authors, who approved the  
663 paper in its final form.

664

665 **Acknowledgements**

666 We would like to thank all the past and present members of the Ministry of Environment and  
667 Climate Affairs, MECA, Oman, now the Environment Authority Oman, and especially to Ali  
668 Al Kiyumi, Suleiman Nasser Al Akhzami, Thuraya Al Sariri, Ahmed Said Al Shukaili, Ali  
669 Alghafri, Sultan Khalifa, Hamed Al Farqani, Salim Bait Bilal, Iman Sulaiman Alzari, Aziza  
670 Saud Al Adhoobi, Mohammed Al Shariyani, Zeyana Salim Al Omairi and Abdullah bin Ali Al  
671 Amri, Chariman of the Environment Authority. We are also very grateful to past members  
672 and collaborators including Edwin Nicholas Arnold, Michael D. Robinson, Andrew Gardner,  
673 Josep Roca, Philip de Pous, Margarita Metallinou, Loukia Spilani and Dean Addams for their  
674 help and support. In the UAE, we wish to thank His Highness Sheikh Dr. Sultan bin  
675 Mohammed Al Qasimi, Supreme Council Member and Ruler of Sharjah, H. E. Ms. Hana Saif  
676 al Suwaidi (Chairperson of the Environment and Protected Areas Authority, Sharjah), Paul  
677 Vercammen and Kevin Budd (Breeding Centre for Endangered Arabian Wildlife), and Gary  
678 Feulner (Dubai Natural History Group) for their continuous support. SC is supported by  
679 grants PGC2018-098290-B-I00 (MCIU/AEI/FEDER, UE) and PID2021-128901NB-I00  
680 funded by MCIN/AEI/ 10.13039/501100011033 and by ERDF, a way of making Europe. BB-  
681 C was funded by FPU grant from Ministerio de Ciencia, Innovación y Universidades, Spain  
682 (FPU18/04742). AT is supported by “la Caixa” doctoral fellowship programme  
683 (LCF/BQ/DR20/11790007). GR was funded by an FPI grant from the Ministerio de Ciencia,

684 Innovación y Universidades, Spain (PRE2019-088729). HT-C is supported by a "Juan de la  
685 Cierva - Formación" postdoctoral fellowship (FJC2021-046832-I) funded by  
686 MCIN/AEI/10.13039/501100011033 and by the European Union NextGenerationEU/PRTR.  
687 No in vivo experiments were performed. The field study was carried out with the  
688 authorization of the governments of UAE and Oman. Permits from Oman were issued by the  
689 Nature Conservation Department of the Ministry of Environment and Climate Affairs, Oman  
690 (Refs: 08/2005; 16/2008; 38/2010; 12/2011; 13/2013; 21/2013; 37/2014; 31/2016;  
691 6210/10/21).

692

### 693 **References**

- 694 Arnold, E. N. (1980). The reptiles and amphibians of Dhofar, southern Arabia. *Journal of*  
695 *Oman Studies*, Special Report, 2, 273–332.
- 696 Bouckaert, R., Vaughan, T. G., Barido-Sottani, J., Duchêne, S., Fourment, M., Gavryushkina,  
697 A., ... Drummond, A. J. (2019). BEAST 2.5: An advanced software platform for  
698 Bayesian evolutionary analysis. *PLOS Computational Biology*, 15(4), e1006650. doi:  
699 10.1371/JOURNAL.PCBI.1006650
- 700 Bray, T. C., Alagaili, A. N., & Bennett, N. C. (2014). A widespread problem: Cryptic  
701 diversity in the Libyan jird. *Zoological Studies* 2014 53:1, 53(1), 1–8. doi:  
702 10.1186/S40555-014-0033-3
- 703 Bryant, D., Bouckaert, R., Felsenstein, J., Rosenberg, N. A., & Roychoudhury, A. (2012).  
704 Inferring Species Trees Directly from Biallelic Genetic Markers: Bypassing Gene Trees  
705 in a Full Coalescent Analysis. *Molecular Biology and Evolution*, 29(8), 1917–1932. doi:  
706 10.1093/MOLBEV/MSS086
- 707 Burriel-Carranza, B., Els, J., & Carranza, S. (2022). *Reptiles & Amphibians of the Hajar*  
708 *Mountains*. Madrid: Editorial CSIC. ISBN: 978-84-00-10988-2.
- 709 Burriel-Carranza, B., Tarroso, P., Els, J., Gardner, A., Soorae, P., Mohammed, A. A., ...  
710 Carranza, S. (2019). An integrative assessment of the diversity, phylogeny, distribution,  
711 and conservation of the terrestrial reptiles (Sauropsida, Squamata) of the United Arab  
712 Emirates. *PLOS ONE*, 14(5), e0216273. doi: 10.1371/JOURNAL.PONE.0216273

- 713 Carranza, S., & Arnold, E. N. (2012). A review of the geckos of the genus *Hemidactylus*  
714 (Squamata: Gekkonidae) from Oman based on morphology, mitochondrial and nuclear  
715 data, with descriptions of eight new species. In *Zootaxa* (Vol. 95).
- 716 Carranza, S., Els, J., & Burriel-Carranza, B. (2021). A field guide to the reptiles of Oman.  
717 Madrid: Digital CSIC. ISBN: 978-84-00-10876-2.
- 718 Carranza, S., Xipell, M., Tarroso, P., Gardner, A., Arnold, E. N., Robinson, M. D., ...  
719 Akhzami, S. N. A. (2018). Diversity, distribution and conservation of the terrestrial  
720 reptiles of Oman (Sauropsida, Squamata). In *PLoS ONE* (Vol. 13). doi:  
721 10.1371/journal.pone.0190389
- 722 Chan, K. O., Hutter, C. R., Wood, P. L., Grismer, L. L., Das, I., & Brown, R. M. (2020). Gene  
723 flow creates a mirage of cryptic species in a Southeast Asian spotted stream frog  
724 complex. *Molecular Ecology*, 29(20), 3970–3987. doi: 10.1111/mec.15603
- 725 Chang, C. C., Chow, C. C., Tellier, L. C. A. M., Vattikuti, S., Purcell, S. M., & Lee, J. J.  
726 (2015). Second-generation PLINK: Rising to the challenge of larger and richer datasets.  
727 *GigaScience*, 4(1), 7. doi: 10.1186/S13742-015-0047-8/2707533
- 728 Chattopadhyay, B., Garg, K. M., Kumar, A. K. V., Doss, D. P. S., Rheindt, F. E., Kandula, S.,  
729 & Ramakrishnan, U. (2016). Genome-wide data reveal cryptic diversity and genetic  
730 introgression in an Oriental cynopterine fruit bat radiation. *BMC Evolutionary Biology*,  
731 16(1), 1–15. doi: 10.1186/S12862-016-0599-Y/TABLES/1
- 732 de Pous, P., Machado, L., Metallinou, M., Červenka, J., Kratochvíl, L., Paschou, N., ...  
733 Carranza, S. (2016). Taxonomy and biogeography of *Bunopus spatulurus* (Reptilia;  
734 Gekkonidae) from the Arabian Peninsula. *Journal of Zoological Systematics and*  
735 *Evolutionary Research*, 54(1), 67–81. doi: 10.1111/jzs.12107
- 736 De Queiroz, K. (2007). Species Concepts and Species Delimitation. *Systematic Biology*,  
737 56(6), 879–886. doi: 10.1080/10635150701701083
- 738 Derycke, S., Fonseca, G., Vierstraete, A., Vanfleteren, J., Vincx, M., & Moens, T. (2008).  
739 Disentangling taxonomy within the *Rhabditis (Pellioiditis) marina* (Nematoda,  
740 Rhabditidae) species complex using molecular and morphological tools. *Zoological*  
741 *Journal of the Linnean Society*, 152(1), 1–15. doi: 10.1111/J.1096-3642.2007.00365.X
- 742 Dufresnes, C., Pribille, M., Alard, B., Gonçalves, H., Amat, F., Crochet, P.-A., ... Martínez-  
743 Solano, I. (2020). Integrating hybrid zone analyses in species delimitation: Lessons



- 744 from two anuran radiations of the Western Mediterranean. *Heredity*, 124(3), 423–438.  
745 doi: 10.1038/s41437-020-0294-z
- 746 Eaton, D. A. R., & Overcast, I. (2020). ipyrad: Interactive assembly and analysis of RADseq  
747 datasets. *Bioinformatics*, 36(8), 2592–2594. doi: 10.1093/BIOINFORMATICS/BTZ966
- 748 Ezard, T., Fujisawa, T., & Barraclough, T. (2021). splits: SPecies' LIimits by Threshold  
749 Statistics. Retrieved from <https://R-Forge.R-project.org/projects/splits/>
- 750 Fennessy, J., Bidon, T., Reuss, F., Kumar, V., Elkan, P., Nilsson, M. A., ... Janke, A. (2016).  
751 Multi-locus Analyses Reveal Four Giraffe Species Instead of One. *Current Biology*,  
752 26(18), 2543–2549. doi: 10.1016/J.CUB.2016.07.036
- 753 Fišer, C., Robinson, C. T., & Malard, F. (2018). Cryptic species as a window into the  
754 paradigm shift of the species concept. *Molecular Ecology*, 27(3), 613–635. doi:  
755 10.1111/MEC.14486
- 756 Flouri, T., Jiao, X., Rannala, B., & Yang, Z. (2018). Species Tree Inference with BPP Using  
757 Genomic Sequences and the Multispecies Coalescent. *Molecular Biology and*  
758 *Evolution*, 35(10), 2585–2593. doi: 10.1093/molbev/msy147
- 759 Fujisawa, T., & Barraclough, T. G. (2013). Delimiting Species Using Single-Locus Data and  
760 the Generalized Mixed Yule Coalescent Approach: A Revised Method and Evaluation  
761 on Simulated Data Sets. *Systematic Biology*, 62(5), 707–724. doi:  
762 10.1093/sysbio/syt033
- 763 Garcia-Porta, J., Simó-Riudalbas, M., Robinson, M., & Carranza, S. (2017). Diversification in  
764 arid mountains: Biogeography and cryptic diversity of *Pristurus rupestris rupestris* in  
765 Arabia. *Journal of Biogeography*, 44(8), 1694–1704. doi: 10.1111/jbi.12929
- 766 Glennie, K. W. (1998). The desert of southeast Arabia: A product of Quaternary climatic  
767 change. In *Quaternary Deserts and Climatic Change*. CRC Press.
- 768 Gosselin, T., Lamothe, M., Devloo-Delva, F., & Grewe, P. (2017). radiator: RADseq data  
769 exploration, manipulation and visualization using R. R Package Version 0.0, 5.
- 770 Huson, D. H., & Bryant, D. (2006). Application of Phylogenetic Networks in Evolutionary  
771 Studies. *Molecular Biology and Evolution*, 23(2), 254–267. doi:  
772 10.1093/molbev/msj030
- 773 Isaac, N. J. B., Mallet, J., & Mace, G. M. (2004). Taxonomic inflation: Its influence on  
774 macroecology and conservation. *Trends in Ecology & Evolution*, 19(9), 464–469. doi:  
775 10.1016/J.TREE.2004.06.004



- 776 Ivanov, V., Lee, K. M., & Mutanen, M. (2018). Mitonuclear discordance in wolf spiders:  
777 Genomic evidence for species integrity and introgression. *Molecular Ecology*, 27(7),  
778 1681–1695. doi: 10.1111/MEC.14564
- 779 Jackson, N. D., Morales, A. E., Carstens, B. C., & O’Meara, B. C. (2017). PHRAPL:  
780 Phylogeographic Inference Using Approximate Likelihoods. *Systematic Biology*, 66(6),  
781 1045–1053. doi: 10.1093/SYSBIO/SYX001
- 782 Kass, R. E., & Raftery, A. E. (1995). Bayes Factors. *Journal of the American Statistical*  
783 *Association*, 90(430), 773–795. doi: 10.1080/01621459.1995.10476572
- 784 Knaus, B. J., & Grünwald, N. J. (2017). vcfr: A package to manipulate and visualize variant  
785 call format data in R. *Molecular Ecology Resources*, 17(1), 44–53. doi: 10.1111/1755-  
786 0998.12549
- 787 Kornilios, P., Thanou, E., Lymberakis, P., Ilgaz, Ç., Kumlutaş, Y., & Leaché, A. (2019).  
788 Genome-wide markers untangle the green-lizard radiation in the Aegean Sea and  
789 support a rare biogeographical pattern. *Journal of Biogeography*, 46(3), 552–567. doi:  
790 10.1111/jbi.13524
- 791 Kozlov, A. M., Darriba, D., Flouri, T., Morel, B., & Stamatakis, A. (2019). RAxML-NG: a  
792 fast, scalable and user-friendly tool for maximum likelihood phylogenetic inference.  
793 *Bioinformatics*, 35(21), 4453–4455. doi: 10.1093/BIOINFORMATICS/BTZ305
- 794 Leaché, A. D., Zhu, T., Rannala, B., & Yang, Z. (2019). The Spectre of Too Many Species.  
795 *Systematic Biology*, 68(1), 168–181. doi: 10.1093/SYSBIO/SYY051
- 796 Main, D. C., van Vuuren, B. J., Tilbury, C. R., & Tolley, K. A. (2022). Out of southern  
797 Africa: Origins and cryptic speciation in *Chamaeleo*, the most widespread chameleon  
798 genus. *Molecular Phylogenetics and Evolution*, 175, 107578. doi:  
799 10.1016/J.YMPEV.2022.107578
- 800 Malinsky, M., Matschiner, M., & Svardal, H. (2021). Dsuite—Fast D-statistics and related  
801 admixture evidence from VCF files. *Molecular Ecology Resources*, 21(2), 584–595.  
802 doi: 10.1111/1755-0998.13265
- 803 Marshall, T. L., Chambers, E. A., Matz, M. V., & Hillis, D. M. (2021). How mitonuclear  
804 discordance and geographic variation have confounded species boundaries in a widely  
805 studied snake. *Molecular Phylogenetics and Evolution*, 162, 107194. doi:  
806 10.1016/J.YMPEV.2021.107194

- 807 Mayden, R. L. (1997). A hierarchy of species concepts: The denouement in the saga of the  
808 species problem (Claridge M.F, Dawah H.A, & Wilson M.R., Eds.). Retrieved from  
809 <https://philpapers.org/rec/MAYAHO-6>
- 810 Metallinou, M., & Carranza, S. (2013). New species of *Stenodactylus* (Squamata:  
811 Gekkonidae) from the Sharqiyah Sands in northeastern Oman. *Zootaxa*, 3745, 449–468.  
812 doi: 10.11646/zootaxa.3745.4.3
- 813 Metallinou, M., Červenka, J., Crochet, P. A., Kratochvíl, L., Wilms, T., Geniez, P., ...  
814 Carranza, S. (2015). Species on the rocks: Systematics and biogeography of the rock-  
815 dwelling *Ptyodactylus geckos* (Squamata: Phyllodactylidae) in North Africa and Arabia.  
816 *Molecular Phylogenetics and Evolution*, 85, 208–220. doi:  
817 10.1016/j.ympev.2015.02.010
- 818 Nguyen, L.-T., Schmidt, H. A., von Haeseler, A., & Minh, B. Q. (2015). IQ-TREE: A Fast  
819 and Effective Stochastic Algorithm for Estimating Maximum-Likelihood Phylogenies.  
820 *Molecular Biology and Evolution*, 32(1), 268–274. doi: 10.1093/molbev/msu300
- 821 O’Leary, S. J., Puritz, J. B., Willis, S. C., Hollenbeck, C. M., & Portnoy, D. S. (2018). These  
822 aren’t the loci you’e looking for: Principles of effective SNP filtering for molecular  
823 ecologists. *Molecular Ecology*, 27(16), 3193–3206. doi: 10.1111/MEC.14792
- 824 Peterson, B. K., Weber, J. N., Kay, E. H., Fisher, H. S., & Hoekstra, H. E. (2012). Double  
825 Digest RADseq: An Inexpensive Method for De Novo SNP Discovery and Genotyping  
826 in Model and Non-Model Species. *PLOS ONE*, 7(5), e37135. doi:  
827 10.1371/JOURNAL.PONE.0037135
- 828 Pons, J., Barraclough, T. G., Gomez-Zurita, J., Cardoso, A., Duran, D. P., Hazell, S., ...  
829 Vogler, A. P. (2006). Sequence-Based Species Delimitation for the DNA Taxonomy of  
830 Undescribed Insects. *Systematic Biology*, 55(4), 595–609. doi:  
831 10.1080/10635150600852011
- 832 Radies, D., Preusser, F., Matter, A., & Mange, M. (2004). Eustatic and climatic controls on  
833 the development of the Wahiba Sand Sea, Sultanate of Oman. *Sedimentology*, 51(6),  
834 1359–1385. doi: 10.1111/j.1365-3091.2004.00678.x
- 835 Rambaut, A., & Drummond, A. J. (2013). Tracer v1. 5 Available from [http://beast.bio.ed.](http://beast.bio.ed.ac.uk/Tracer)  
836 [Ac. Uk/Tracer](http://beast.bio.ed.ac.uk/Tracer). Accessed.

- 837 Rannala, B., & Yang, Z. (2003). Bayes Estimation of Species Divergence Times and  
838 Ancestral Population Sizes Using DNA Sequences From Multiple Loci. *Genetics*,  
839 164(4), 1645–1656. doi: 10.1093/GENETICS/164.4.1645
- 840 Rannala, B., & Yang, Z. (2013). Improved Reversible Jump Algorithms for Bayesian Species  
841 Delimitation. *Genetics*, 194(1), 245–253. doi: 10.1534/genetics.112.149039
- 842 Riaño, G., Fontserè, C., Manuel, M. de, Talavera, A., Burriel-Carranza, B., Tejero-Cicuéndez,  
843 H., ... Carranza, S. (2022). Genomics reveals introgression and purging of deleterious  
844 mutations in the Arabian leopard (*Panthera pardus nimr*). p. 2022.11.08.515636.  
845 bioRxiv. doi: 10.1101/2022.11.08.515636
- 846 Shults, P., Hopken, M., Eyer, P. A., Blumenfeld, A., Mateos, M., Cohnstaedt, L. W., &  
847 Vargo, E. L. (2022). Species delimitation and mitonuclear discordance within a species  
848 complex of biting midges. *Scientific Reports* 2022 12:1, 12(1), 1–13. doi:  
849 10.1038/s41598-022-05856-x
- 850 Simó-Riudalbas, M., Pous, P. de, Els, J., Jayasinghe, S., Péntek-Zakar, E., Wilms, T., ...  
851 Carranza, S. (2017). Cryptic diversity in *Ptyodactylus* (reptilia: Gekkonidae) from the  
852 northern hajar mountains of Oman and the United Arab Emirates uncovered by an  
853 integrative taxonomic approach. *PLoS ONE*, 12(8), 1–25. doi:  
854 10.1371/journal.pone.0180397
- 855 Simó-Riudalbas, M., Tarroso, P., Papenfuss, T., Al-Sariri, T., & Carranza, S. (2018).  
856 Systematics, biogeography and evolution of *Asaccus gallagheri* (Squamata,  
857 Phyllodactylidae) with the description of a new endemic species from Oman.  
858 *Systematics and Biodiversity*, 16(4), 323–339. doi: 10.1080/14772000.2017.1403496
- 859 Šmíd, J., Sindaco, R., Shobrak, M., Busais, S., Tamar, K., Aghová, T., ... Carranza, S. (2021).  
860 Diversity patterns and evolutionary history of Arabian squamates. *Journal of*  
861 *Biogeography*, 48(5), 1183–1199. doi: 10.1111/jbi.14070
- 862 Stange, M., Sánchez-Villagra, M. R., Salzburger, W., & Matschiner, M. (2018). Bayesian  
863 Divergence-Time Estimation with Genome-Wide Single-Nucleotide Polymorphism  
864 Data of Sea Catfishes (Ariidae) Supports Miocene Closure of the Panamanian Isthmus.  
865 *Systematic Biology*, 67(4), 681–699. doi: 10.1093/SYSBIO/SYY006
- 866 Sukumaran, J., & Knowles, L. L. (2017). Multispecies coalescent delimits structure, not  
867 species. *Proceedings of the National Academy of Sciences*, 114(7), 1607–1612. doi:  
868 10.1073/PNAS.1607921114

- 869 Tamar, K., Chirio, L., Shobrak, M., Busais, S., & Carranza, S. (2019). Using multilocus  
870 approach to uncover cryptic diversity within *Pseudotrapelus* lizards from Saudi Arabia.  
871 Saudi Journal of Biological Sciences, 26(7), 1442–1449. doi:  
872 10.1016/j.sjbs.2019.05.006
- 873 Tamar, K., Mitsi, P., & Carranza, S. (2019). Cryptic diversity revealed in the leaf-toed gecko  
874 *Asaccus montanus* (Squamata, Phyllodactylidae) from the Hajar Mountains of Arabia.  
875 Journal of Zoological Systematics and Evolutionary Research, 57(2), 369–382. doi:  
876 10.1111/jzs.12258
- 877 Tejero-Cicuéndez, H., Patton, A. H., Caetano, D. S., Šmíd, J., Harmon, L. J., & Carranza, S.  
878 (2022). Reconstructing Squamate Biogeography in Afro-Arabia Reveals the Influence  
879 of a Complex and Dynamic Geologic Past. Systematic Biology, 71(2), 261–272. doi:  
880 10.1093/SYSBIO/SYAB025
- 881 Thanou, E., Kornilios, P., Lymberakis, P., & Leaché, A. D. (2020). Genomic and  
882 mitochondrial evidence of ancient isolations and extreme introgression in the four-lined  
883 snake. Current Zoology, 66(1), 99–111. doi: 10.1093/cz/zoz018
- 884 Tonzo, V., Papadopoulou, A., & Ortego, J. (2019). Genomic data reveal deep genetic  
885 structure but no support for current taxonomic designation in a grasshopper species  
886 complex. Molecular Ecology, 28(17), 3869–3886. doi: 10.1111/mec.15189
- 887 Vences, M., Multzsch, M., Gippner, S., Miralles, A., Crottini, A., Gehring, P.-S., ... Scherz,  
888 M. D. (2022). Integrative revision of the *Lygodactylus madagascariensis* group reveals  
889 an unexpected diversity of little brown geckos in Madagascar’s rainforest. Zootaxa,  
890 5179(1), 1–61. doi: 10.11646/ZOOTAXA.5179.1.1
- 891 Vilaça, S. T., Piccinno, R., Rota-Stabelli, O., Gabrielli, M., Benazzo, A., Matschiner, M., ...  
892 Bertorelle, G. (2021). Divergence and hybridization in sea turtles: Inferences from  
893 genome data show evidence of ancient gene flow between species. Molecular Ecology,  
894 30(23), 6178–6192. doi: 10.1111/MEC.16113
- 895 Walters, A. D., Cannizzaro, A. G., Trujillo, D. A., & Berg, D. J. (2021). Addressing the  
896 Linnean shortfall in a cryptic species complex. Zoological Journal of the Linnean  
897 Society, 192(2), 277–305. doi: 10.1093/ZOOLINNEAN/ZLAA099
- 898 Wong, T. K., Cherryh, C., Rodrigo, A. G., Hahn, M. W., Minh, B. Q., & Lanfear, R. (2022,  
899 October 8). MAST: Phylogenetic Inference with Mixtures Across Sites and Trees (p.  
900 2022.10.06.511210). p. 2022.10.06.511210. bioRxiv. doi: 10.1101/2022.10.06.511210

- 901 Yang, Z., & Rannala, B. (2010). Bayesian species delimitation using multilocus sequence  
902 data. *Proceedings of the National Academy of Sciences*, 107(20), 9264–9269. doi:  
903 10.1073/pnas.0913022107
- 904 Zhang, C., Sayyari, E., & Mirarab, S. (2017). ASTRAL-III: Increased scalability and impacts  
905 of contracting low support branches. *Lecture Notes in Computer Science (Including*  
906 *Subseries Lecture Notes in Artificial Intelligence and Lecture Notes in Bioinformatics)*,  
907 10562 LNBI, 53–75. doi: 10.1007/978-3-319-67979-2\_4/TABLES/3
- 908

909 **FIGURES**

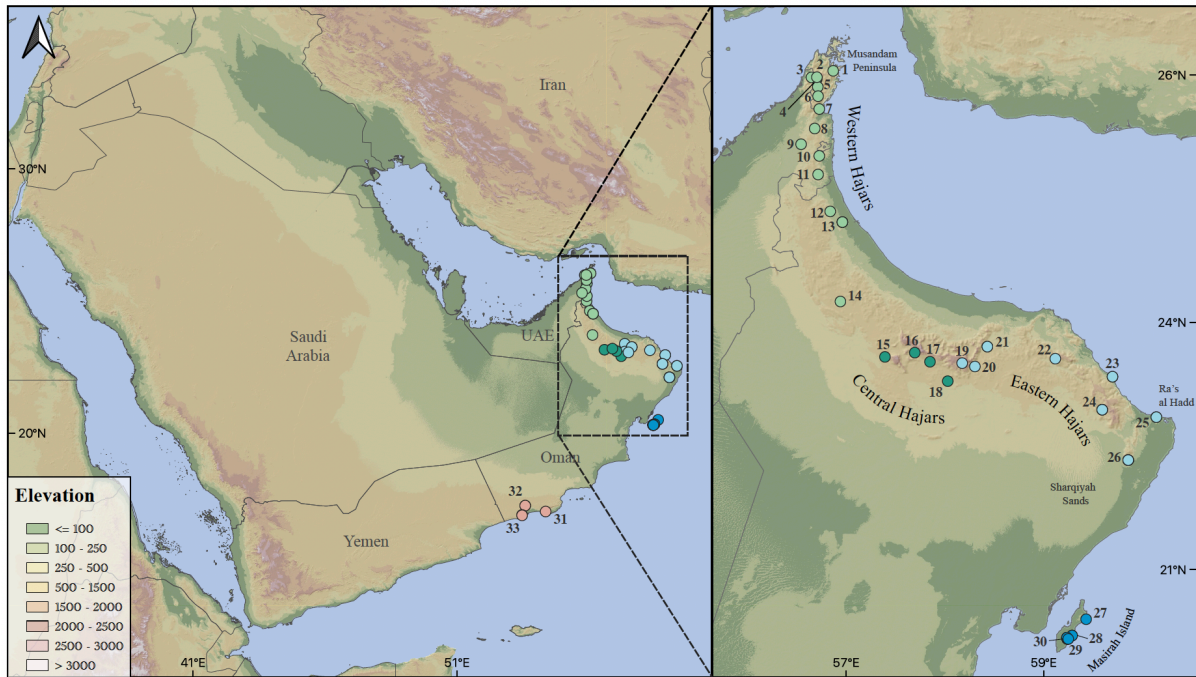

910

911 Figure 1. Topographic map of the study area showing the 33 localities of *Trachydactylus*  
912 sampled for this study (see Table S1 for correspondence between the 33 localities and the 53  
913 sampled specimens); colors represent *T. spatulurus* (pink) and *T. hajarensis* Western (light  
914 green), Central (dark green), Eastern (light blue) and Masirah Island (dark blue) lineages  
915 according to our ddRADseq genomic analyses.

916



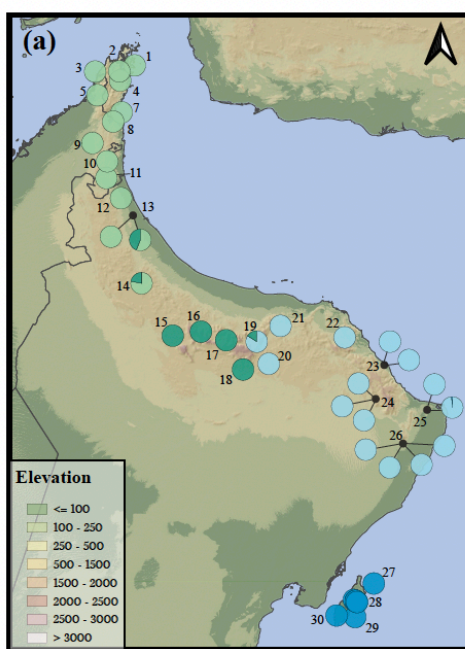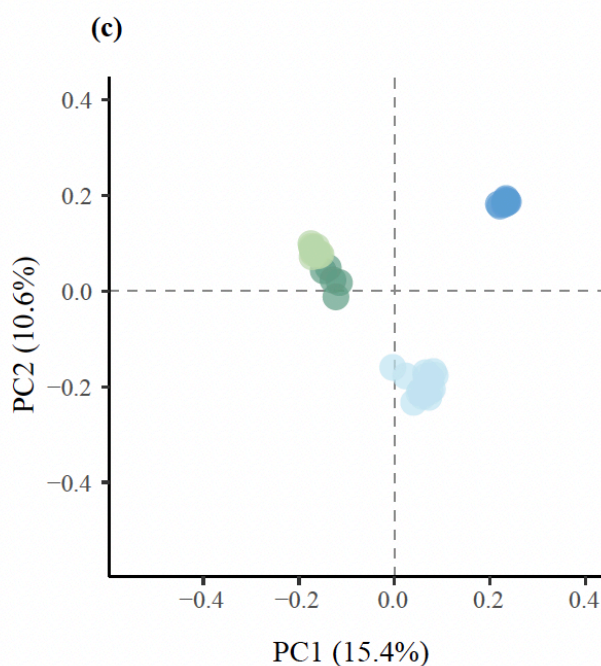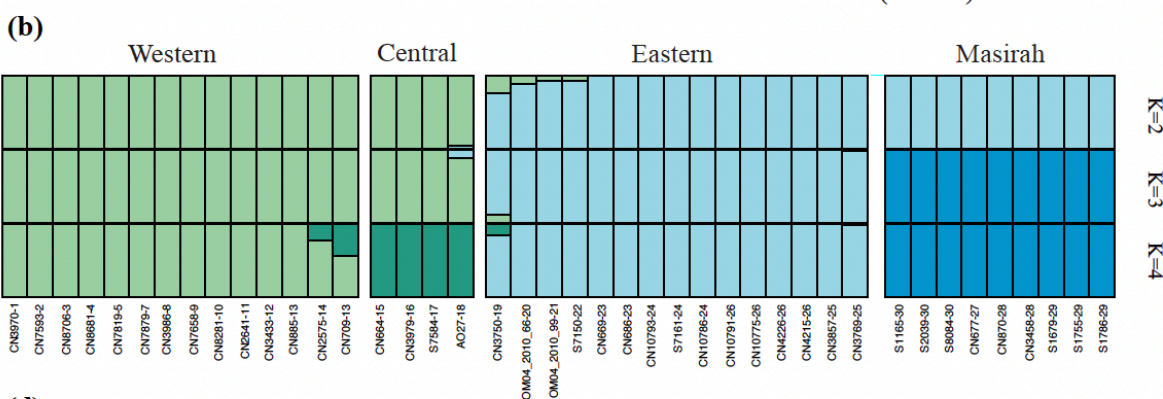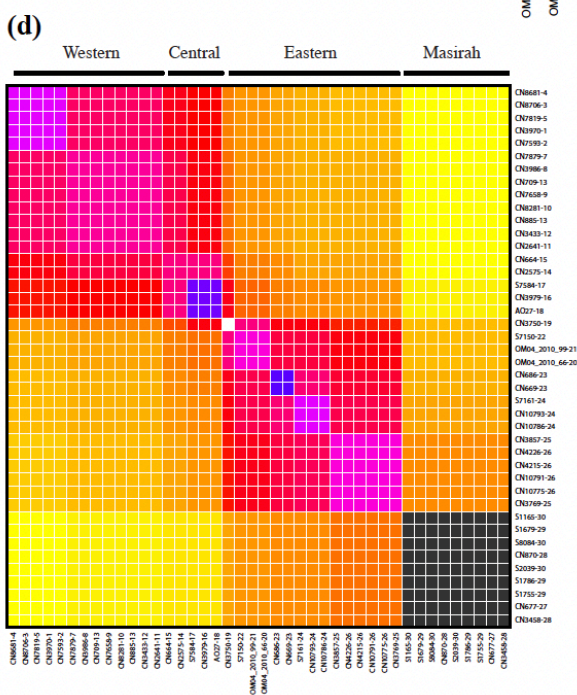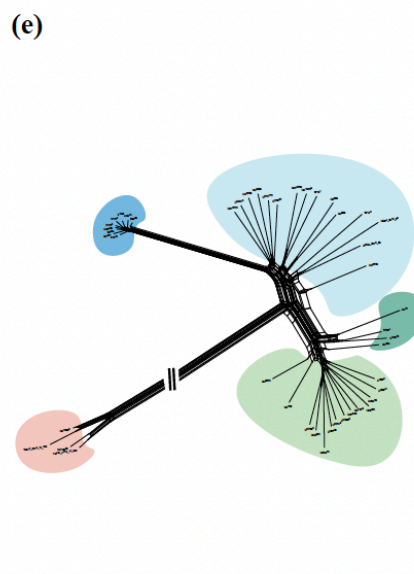

918 Figure 2. Population structure analyses of *T. hajarensis*. **a**: Geographic distribution of the  
919 different individuals analyzed, with pies representing the percentage of admixture for K=3; **b**:  
920 individual assignments of ADMIXTURE nuclear clusters (K=2-4); Numbers after last dash  
921 correspond to locality number from Figure 1 and Table S1; **c**: Principal Component Analysis  
922 (PCA), with points representing the different individuals colored by taxa; **d**: Co-ancestry  
923 matrix generated in fineRADstructure, indicating pairwise genetic similarity between all *T.*  
924 *hajarensis* specimens. To the right, legend shows the number of shared alleles between  
925 individuals. Darker colors represent higher inter-individual co-ancestry; **e**: Phylogenomic  
926 network constructed with the Neighbor-Net algorithm in SplitsTree. *T. spatalurus* (pink); *T.*  
927 *hajarensis* Western (light green), Central (dark green), Eastern (light blue) and Masirah Island  
928 (dark blue) lineages. Datasets contain 2,428 unlinked SNPs (**a,b & c**; *dataset 1*), 30,526 loci  
929 (**d**; *dataset 2*) and 5,219 loci (**e**; *dataset 3*). See table S2 for further specifications on each  
930 dataset.  
931



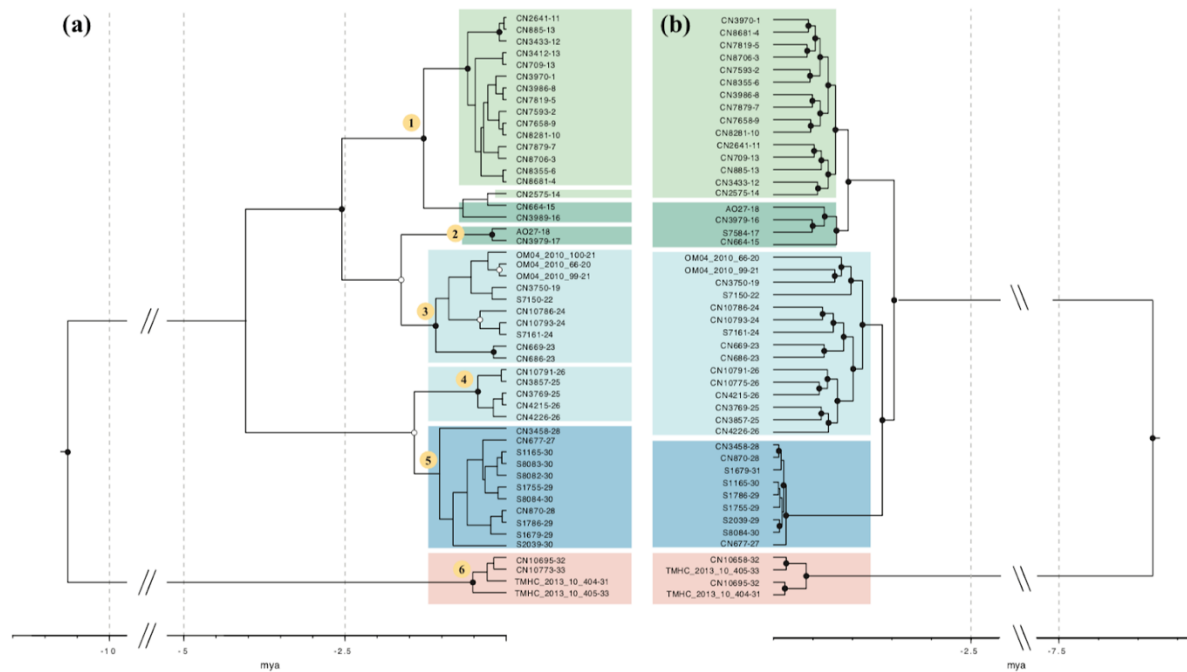

932

933 Figure 3. Bayesian inference time calibrated trees. **a**: Phylogenetic tree based on the *12S*  
 934 mitochondrial gene. Numbers in yellow circles correspond to GMYC species level  
 935 assignment; **b**: Phylogenomic tree inferred with a concatenated dataset of 5,219 nuclear loci.  
 936 Posterior probability (pp) above 0.95 and pp > 0.85 are shown with black and white dots at  
 937 each node respectively; Numbers after last dash correspond to locality number in Figure 1 and  
 938 Table S1; *T. spatalurus* (pink), *T. hajarensis* Western (light green), Central (dark green),  
 939 Eastern (light blue) and Masirah Island (dark blue) lineages.

940

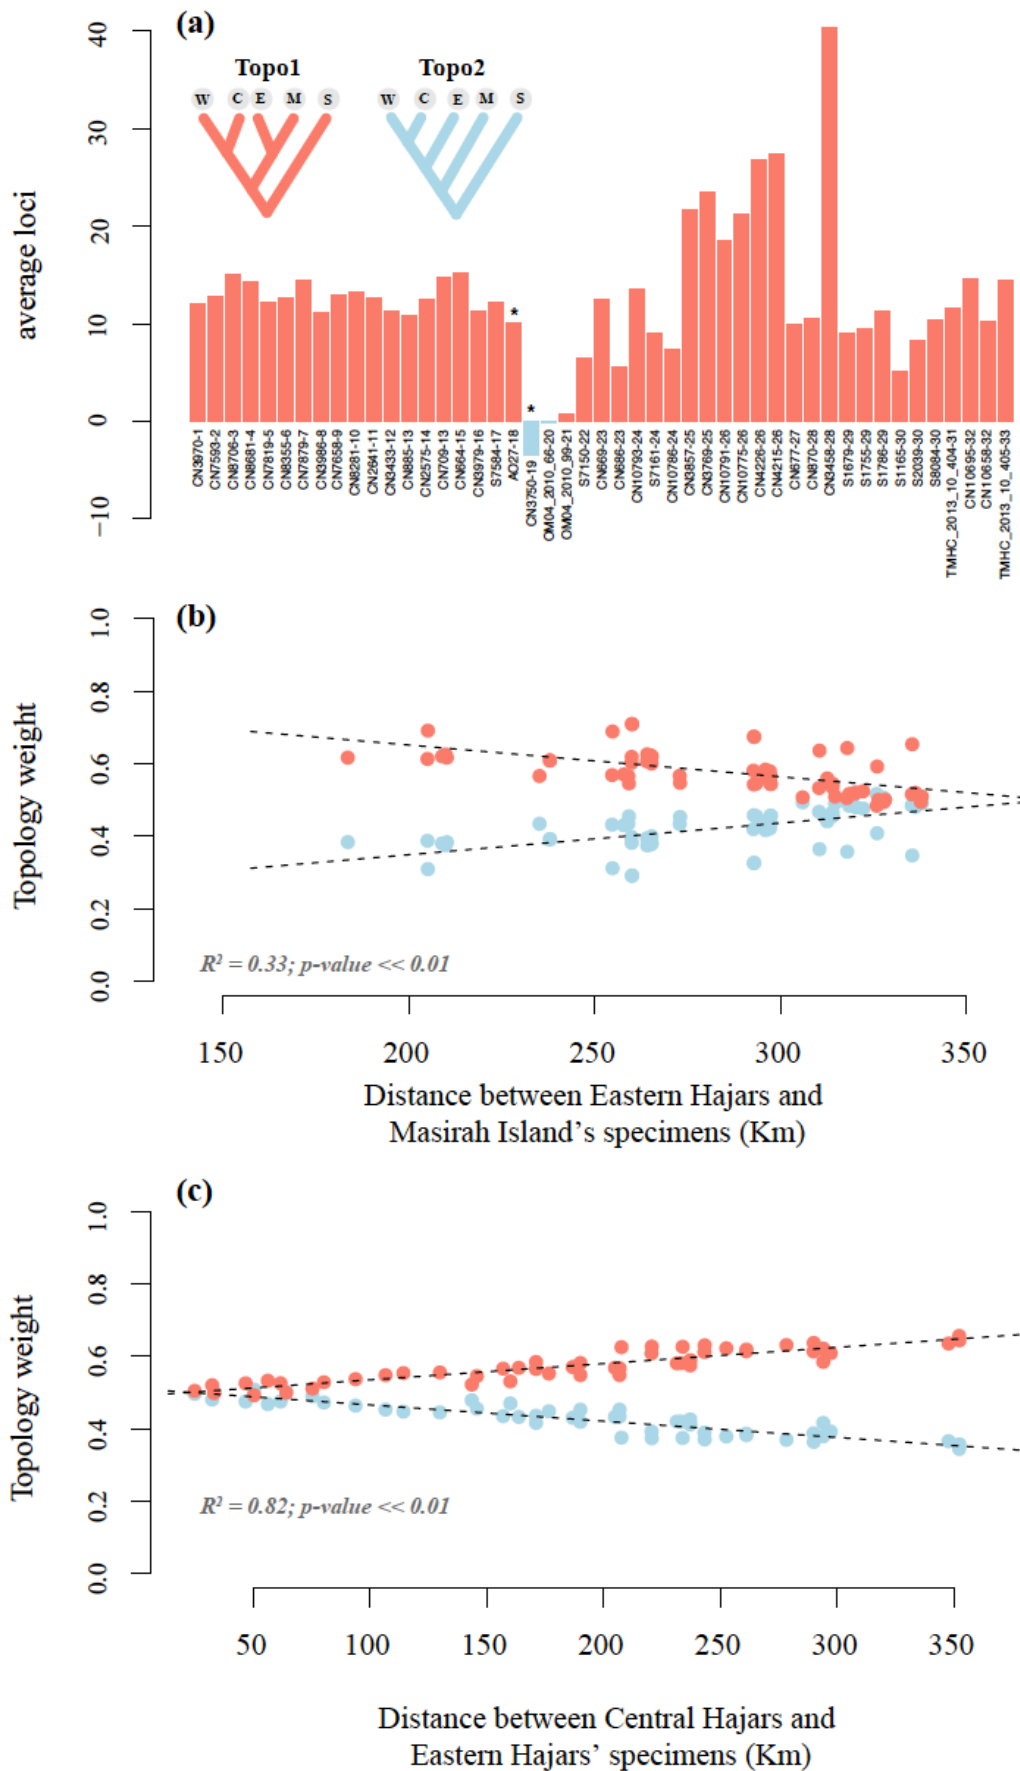

942 Figure 4. Species tree topology testing. **a:** Number of loci averaged across all quintets that  
943 support each topology (shown as *Topo1-Topo2*). Numbers after last dash correspond to  
944 locality number from Figure 1. Asterisks highlight admixed specimens in Figure 2a. *T.*  
945 *spatalurus* (S), *T. hajarensis* Western (W), Central (C), Eastern (E), and Masirah Island (M)  
946 lineages; **b:** Shifts in *Topo1* (salmon) and *Topo2* (blue) topology weights explained by the  
947 distance from each Eastern Hajars' specimen to each Masirah Island's specimen; **c:** Shifts in  
948 *Topo1* (salmon) and *Topo2* (blue) topology weights explained by the distance from each  
949 Eastern Hajars' specimen to each Central Hajars' individual. Each point corresponds to the  
950 averaged topology weight across all quintet combinations with the same Eastern and Masirah  
951 specimens (see Figure S4). The sum of topology weights (*Topo1* and *Topo2*) of each MAST  
952 analysis always adds up to 1.0, thus plotted regression lines have inverse directions but  
953 identical  $R^2$  and  $p$ -values.  
954

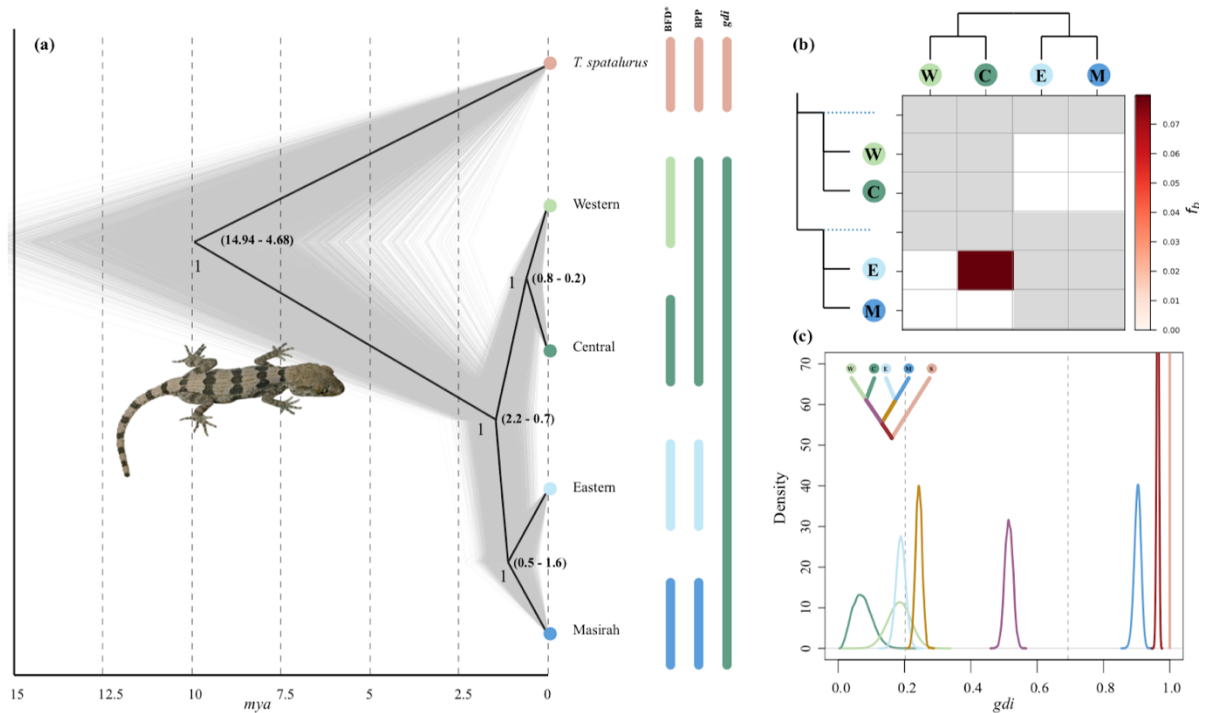

955

956 Figure 5. Species tree, gene flow and species delimitation analyses. **a:** Most supported species  
 957 tree topology between SNAPP, BPP and IQ-TREE analyses. Species tree was inferred with  
 958 SNAPP from *dataset 5 SNAPP* and both posterior (grey) and consensus trees (black) are  
 959 shown. To the right, different coloured bars represent BFD\*, BPP and *gdi* species level  
 960 assignment; **b:** F-branch statistic analysis showing introgression between *Trachydactylus*  
 961 *hajarensis* Eastern and Central clades; **c:** Posterior distribution for the *gdi* values between  
 962 every pair of sister taxa within *Trachydactylus hajarensis*, including *T. spatularus*. Colors in  
 963 the internal branches of the upper-left corner species tree represent subsequent A00 BPP  
 964 analyses where the descendant tips of the branch were lumped together and compared to its  
 965 closest sister group. Values below 0.2 support a single species hypothesis while above 0.7  
 966 supports distinct species status.

967

968

969 SUPPLEMENTARY FIGURES

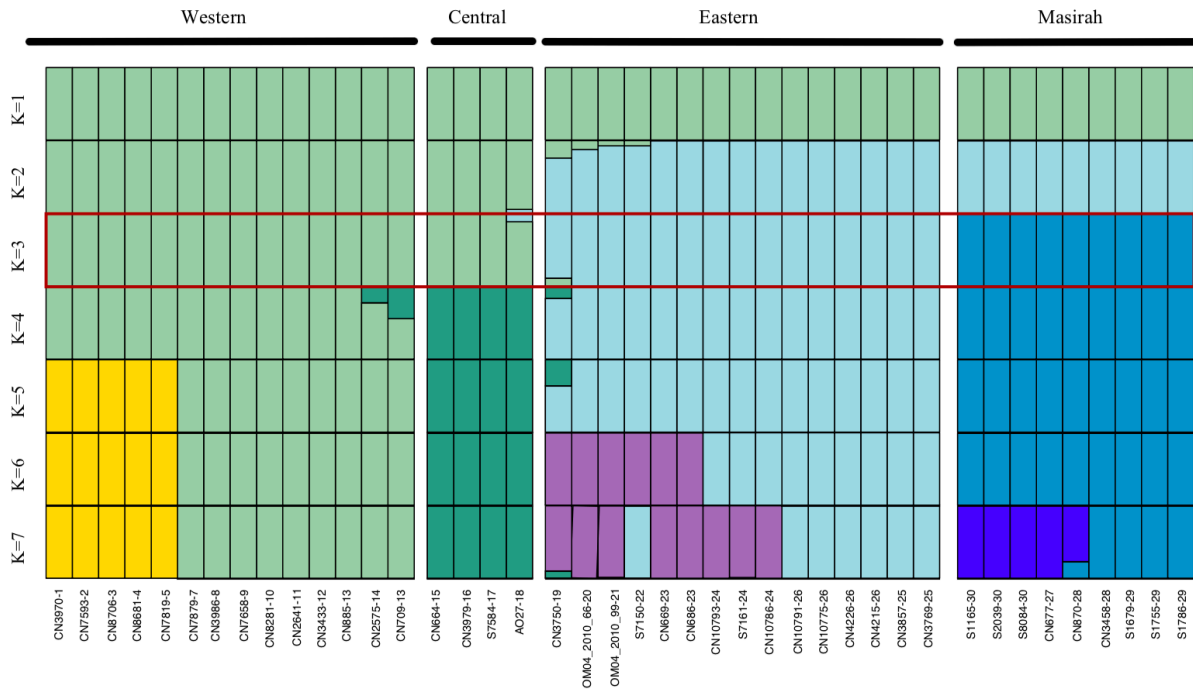

970

971 Figure S1. Individual assignments of ADMIXTURE nuclear clusters from  $K = 1$  to  $K = 7$ .

972 The lowest cross validation result, depicting the most probable number of populations, is

973 highlighted in red. Numbers after last dash correspond to locality number from Figure 1 and

974 Table S1. Information on all the specimens analyzed can be found in Table S1.

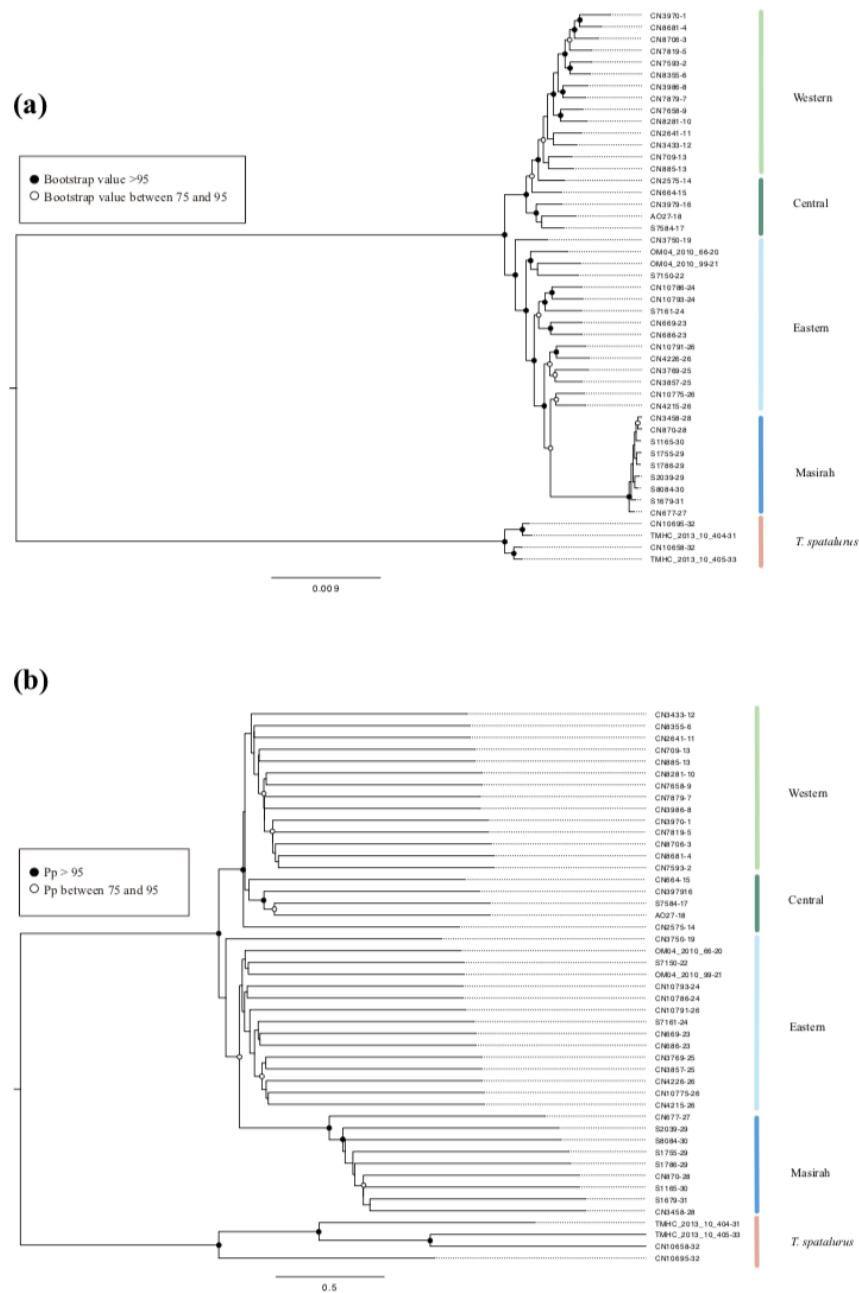

975

976 Figure S2. Maximum likelihood nuclear phylogenomic reconstructions. **a**: Tree inferred with  
977 RAxML-NG with a concatenated dataset of 5,219 loci; **b**: Consensus tree inferred with Astral  
978 after computing 5,219 gene trees in IQ-TREE. Western, Central, Eastern and Masirah  
979 represent the different *Trachydactylus hajarensis* clades. Numbers after last dash correspond  
980 to locality number from Figure 1 and Table S1.

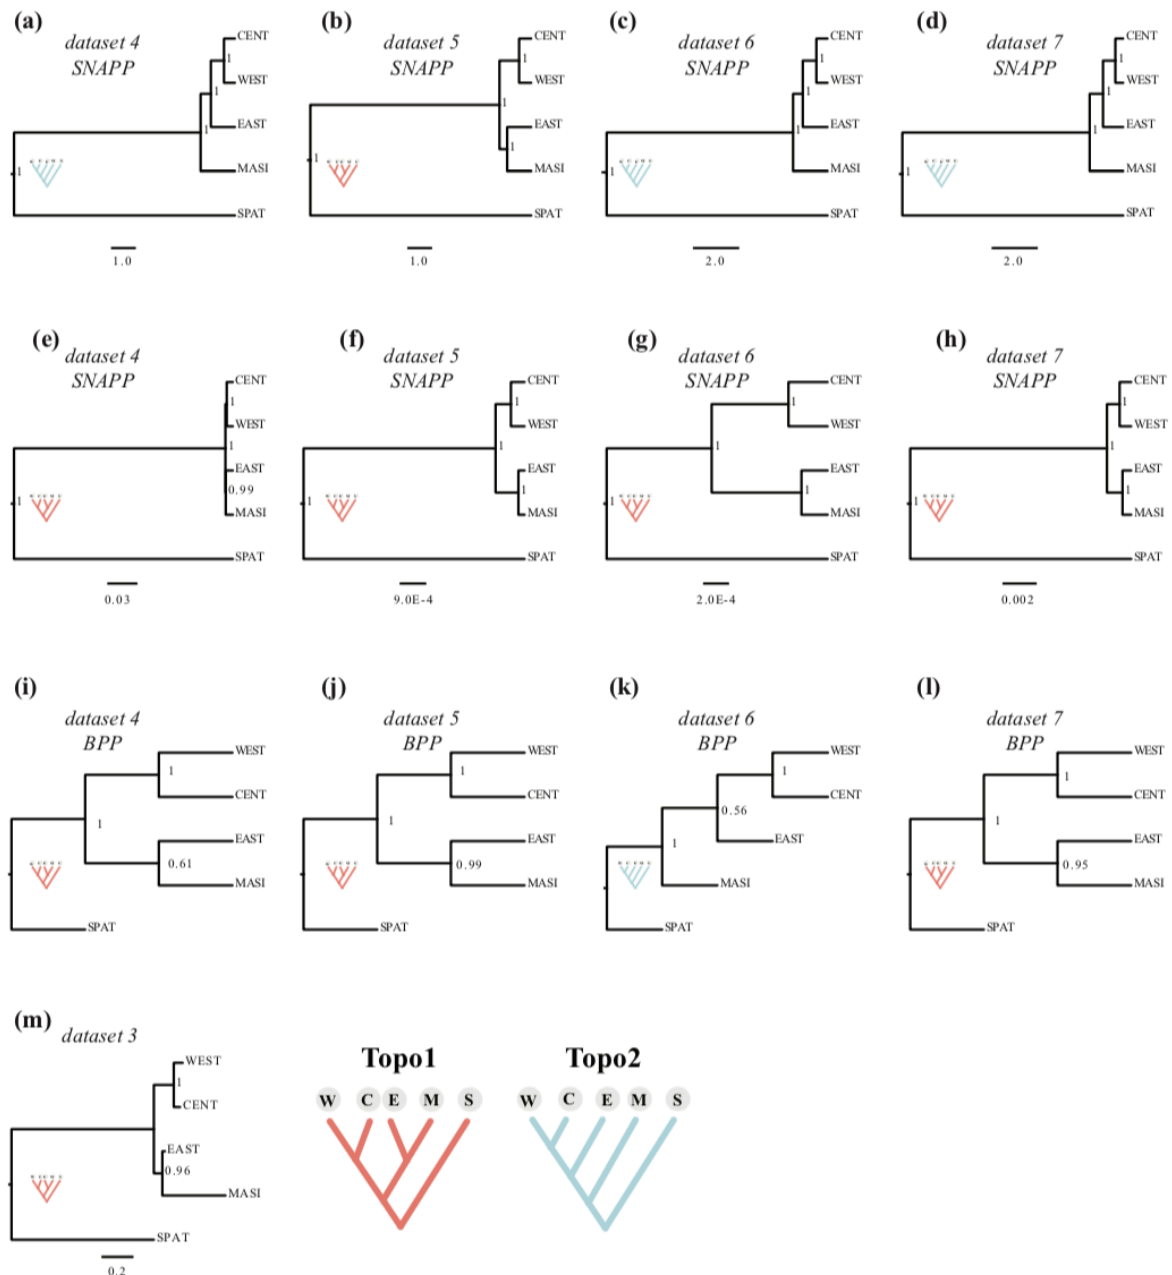

981

982 Figure S3. Species tree topologies with different sample selection. Samples included in each

983 analysis range between 10–20 specimens in *datasets 4–7*, and 47 samples (all available

984 samples) in *dataset 3*. For more information on each dataset see Table S2. Species trees were

985 inferred with SNAPP linking all population sizes (**a–d**), with SNAPP without linking

986 population sizes (**e–h**), with BPP A01 approach (**i–l**), and with Astral after summarizing all

987 5,219 gene trees obtained with IQtree (**m**). Abbreviations are as follow: WEST, Western

988 Clade of *T. hajarensis*; CENT, Central Clade of *T. hajarensis*; EAST, Eastern Clade of *T.*

989 *hajarensis*; MASI, Masirah Island Clade of *T. hajarensis*; SPAT, *T. spatulurus*.



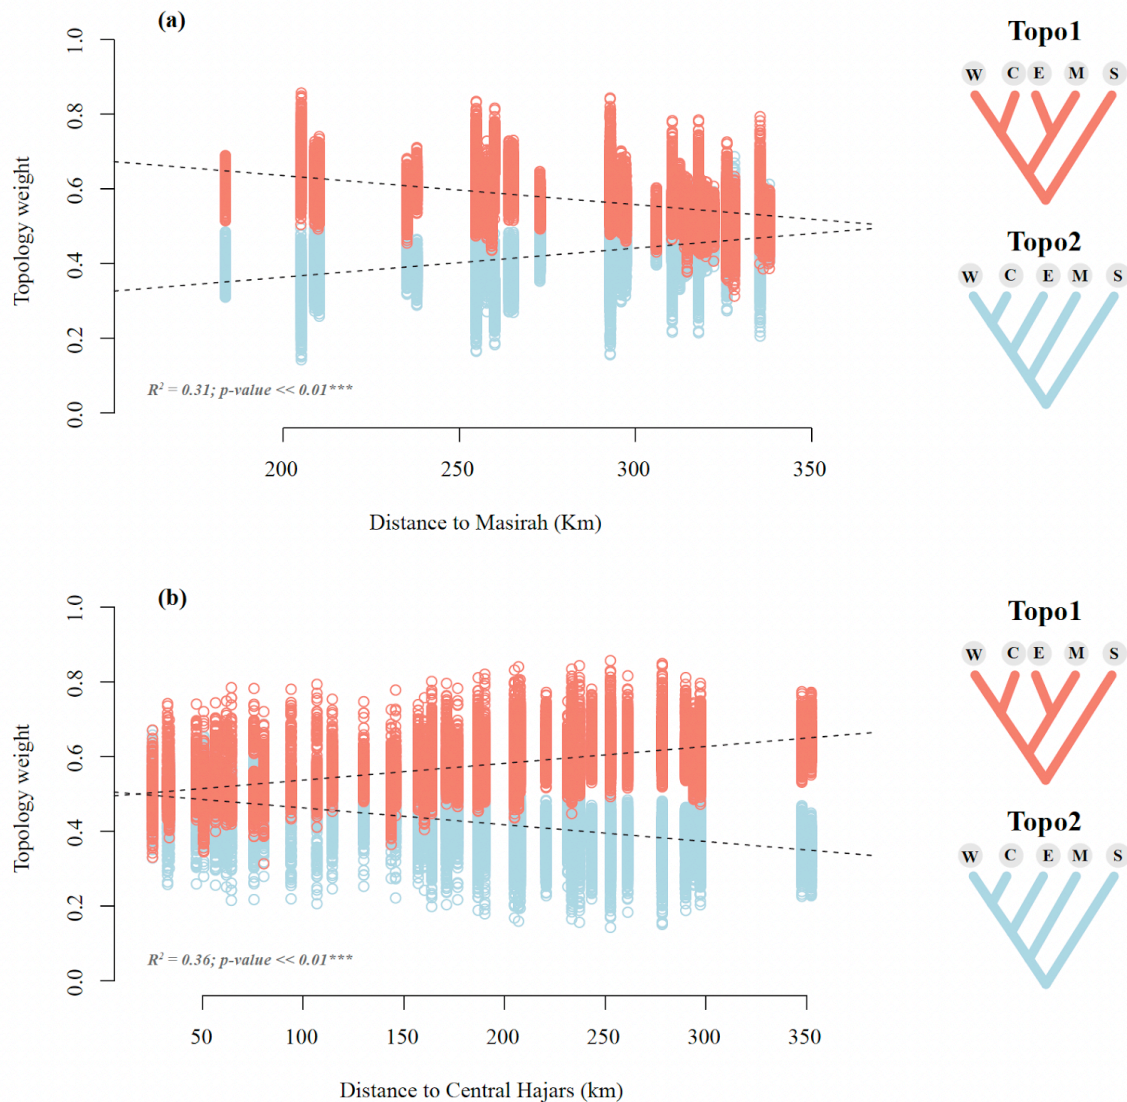

990

991 Figure S4. **a:** Shifts in *Topo1* (salmon) and *Topo2* (blue) topology weights explained by the  
 992 distance from each Eastern Hajars' specimen to each Masirah Island's specimen; **b:** Shifts in  
 993 *Topo1* (salmon) and *Topo2* (blue) topology weights explained by the distance from each  
 994 Eastern Hajars' specimen to each Central Hajars' individual. Each point represents the  
 995 averaged topology weight of a quintet across all its loci. Points distributed across vertical  
 996 lines correspond to quintet combinations where Eastern and Masirah Island specimens  
 997 remained identical but the individuals from the other lineages varied. We accounted for such  
 998 pseudoreplicates by averaging each locality's topology weight (Figure 3), or by including  
 999 them into a nested ANOVA (Tables S3 and S4). The sum of topology weights (*Topo1* and  
 1000 *Topo2*) of each MAST analysis always adds up to 1.0, thus plotted regression lines have  
 1001 inverse directions but identical  $R^2$  and p-values.



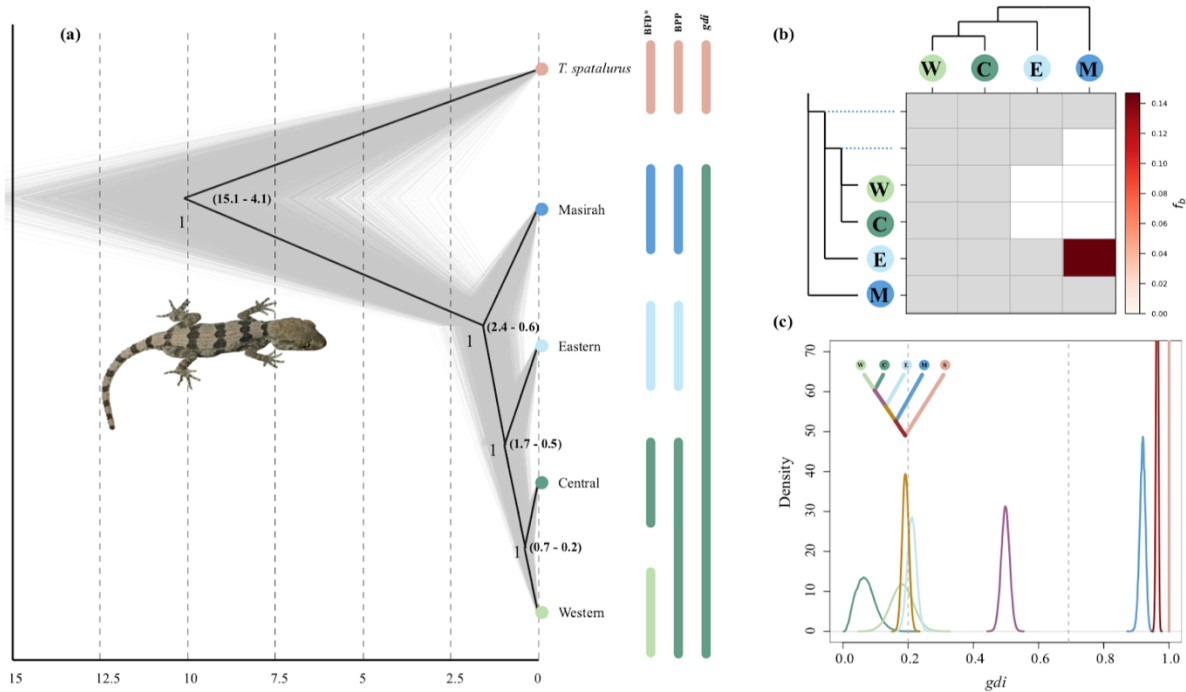

1002

1003 Figure S5. Species tree, gene flow and species delimitation analyses. **a:** Second species tree  
 1004 topology obtained with SNAPP & BPP. Species tree was inferred with SNAPP from *dataset 4*  
 1005 *SNAPP* and posterior trees (grey) and consensus tree (black) are shown. To the right, different  
 1006 coloured bars represent BFD\*, BPP and *gdi* species level assignment, respectively; **b:** F-  
 1007 branch statistic analysis showing introgression between *Trachydactylus hajarensis* Eastern  
 1008 and Masirah Island clades; **c:** Posterior distribution for the *gdi* values between every pair of  
 1009 sister taxa within *Trachydactylus hajarensis*, including *T. spatalurus*. Colors in the internal  
 1010 branches of the upper-left corner species tree represent subsequent A00 BPP analyses where  
 1011 the descendant tips of the branch were lumped together and compared to its closest sister  
 1012 group. Values below 0.2 support a single species hypothesis while above 0.7 supports distinct  
 1013 species status.

1014

1015 **SUPPLEMENTARY TABLES**

**Table S1. Table of all specimens included in this study information regarding location, clade, GenBank accession number, ddRADseq raw and filtered reads as well as information on which individuals are included in each dataset. GenBank accession numbers labeled XXXX were de novo produced and will be uploaded; datasets 4-7 include both SNAPP and BPP datasets in Table S2.**

| Species              | Specimen code | Locality | Country | Latitude | Longitude | Clade   | 12S Accession n° | Raw reads | Filtered reads | Post-processing | dataset 1 | dataset 2 | dataset 3 | dataset 4 | dataset 5 | dataset 6 | dataset 7 |
|----------------------|---------------|----------|---------|----------|-----------|---------|------------------|-----------|----------------|-----------------|-----------|-----------|-----------|-----------|-----------|-----------|-----------|
| <i>T. hajarensis</i> | CN3970        | 1        | Oman    | 26.042   | 56.37     | Western | KT302084         | 1,191,821 | 1,189,784      | YES             | YES       | YES       | YES       | NO        | NO        | NO        | NO        |
| <i>T. hajarensis</i> | CN7593        | 2        | Oman    | 25.978   | 56.205    | Western | XXX              | 2,829,981 | 2,820,714      | YES             | YES       | YES       | YES       | NO        | NO        | NO        | NO        |
| <i>T. hajarensis</i> | CN8706        | 3        | UAE     | 25.976   | 56.15     | Western | KT302083         | 932,759   | 930,372        | YES             | YES       | YES       | YES       | NO        | NO        | NO        | NO        |
| <i>T. hajarensis</i> | CN8681        | 4        | Oman    | 25.957   | 56.203    | Western | XXX              | 5,840,800 | 5,823,408      | YES             | YES       | YES       | YES       | YES       | YES       | YES       | YES       |
| <i>T. hajarensis</i> | CN7819        | 5        | Oman    | 25.88    | 56.214    | Western | KT302080         | 1,583,871 | 1,580,461      | YES             | YES       | YES       | YES       | NO        | NO        | NO        | NO        |
| <i>T. hajarensis</i> | CN8355        | 6        | Oman    | 25.786   | 56.217    | Western | XXX              | 416,106   | 415,073        | YES             | NO        | NO        | YES       | NO        | NO        | NO        | NO        |
| <i>T. hajarensis</i> | CN7879        | 7        | Oman    | 25.656   | 56.229    | Western | XXX              | 1,338,816 | 1,335,631      | YES             | YES       | YES       | YES       | NO        | NO        | NO        | NO        |
| <i>T. hajarensis</i> | CN3986        | 8        | UAE     | 25.459   | 56.183    | Western | KT302078         | 1,515,929 | 1,511,634      | YES             | YES       | YES       | YES       | NO        | NO        | NO        | YES       |
| <i>T. hajarensis</i> | CN7658        | 9        | UAE     | 25.3     | 56.045    | Western | KT302079         | 4,384,451 | 4,369,626      | YES             | YES       | YES       | YES       | YES       | YES       | YES       | YES       |
| <i>T. hajarensis</i> | CN8281        | 10       | UAE     | 25.182   | 56.229    | Western | KT302081         | 7,996,636 | 7,984,850      | YES             | YES       | YES       | YES       | NO        | NO        | NO        | NO        |
| <i>T. hajarensis</i> | CN2641        | 11       | UAE     | 24.994   | 56.217    | Western | XXX              | 1,283,653 | 1,281,350      | YES             | YES       | YES       | YES       | NO        | NO        | NO        | NO        |
| <i>T. hajarensis</i> | CN3433        | 12       | Oman    | 24.621   | 56.34     | Western | XXX              | 568,169   | 566,799        | YES             | YES       | YES       | YES       | NO        | NO        | NO        | NO        |
| <i>T. hajarensis</i> | CN3412        | 13       | Oman    | 24.513   | 56.463    | Western | XXX              | 229,466   | 229,09         | NO              | NO        | NO        | NO        | NO        | NO        | NO        | NO        |
| <i>T. hajarensis</i> | CN885         | 13       | Oman    | 24.513   | 56.463    | Western | XXX              | 506,362   | 505,264        | YES             | YES       | YES       | YES       | NO        | NO        | NO        | NO        |
| <i>T. hajarensis</i> | CN709         | 13       | Oman    | 24.513   | 56.463    | Western | XXX              | 1,109,312 | 1,106,557      | YES             | YES       | YES       | YES       | NO        | NO        | NO        | YES       |
| <i>T. hajarensis</i> | CN2575        | 14       | Oman    | 23.71    | 56.443    | Western | XXX              | 332,487   | 331,462        | YES             | YES       | YES       | YES       | NO        | NO        | NO        | NO        |
| <i>T. hajarensis</i> | CN664         | 15       | Oman    | 23.15    | 56.894    | Central | XXX              | 1,600,422 | 1,597,354      | YES             | YES       | YES       | YES       | YES       | NO        | NO        | YES       |
| <i>T. hajarensis</i> | CN3979        | 16       | Oman    | 23.193   | 57.196    | Central | XXX              | 3,993,190 | 3,983,810      | YES             | YES       | YES       | YES       | YES       | YES       | YES       | YES       |
| <i>T. hajarensis</i> | S7584         | 17       | Oman    | 23.101   | 57.35     | Central | -                | 1,713,240 | 1,708,957      | YES             | YES       | YES       | YES       | NO        | YES       | YES       | YES       |
| <i>T. hajarensis</i> | AO27          | 18       | Oman    | 22.905   | 57.53     | Central | KT302062         | 1,775,777 | 1,769,136      | YES             | YES       | YES       | YES       | NO        | NO        | NO        | YES       |
| <i>T. hajarensis</i> | CN3750        | 19       | Oman    | 23.087   | 57.676    | Eastern | XXX              | 242,966   | 242,194        | YES             | YES       | YES       | YES       | NO        | NO        | NO        | NO        |
| <i>T. hajarensis</i> | OM04_2010_66  | 20       | Oman    | 23.053   | 57.805    | Eastern | XXX              | 1,081,611 | 1,079,368      | YES             | YES       | YES       | YES       | NO        | NO        | NO        | NO        |
| <i>T. hajarensis</i> | OM04_2010_99  | 21       | Oman    | 23.254   | 57.931    | Eastern | KT302069         | 2,058,902 | 2,056,273      | YES             | YES       | YES       | YES       | NO        | NO        | NO        | NO        |
| <i>T. hajarensis</i> | OM04_2010_100 | 21       | Oman    | 23.254   | 57.931    | Eastern | XXX              | 21,346    | 21,272         | NO              | NO        | NO        | NO        | NO        | NO        | NO        | NO        |
| <i>T. hajarensis</i> | S7150         | 22       | Oman    | 23.132   | 58.619    | Eastern | KT302066         | 3,949,614 | 3,938,428      | YES             | YES       | YES       | YES       | NO        | NO        | YES       | YES       |
| <i>T. hajarensis</i> | CN686         | 23       | Oman    | 22.949   | 59.198    | Eastern | KT302064         | 4,623,864 | 4,611,556      | YES             | YES       | YES       | YES       | YES       | NO        | YES       | NO        |
| <i>T. hajarensis</i> | CN669         | 23       | Oman    | 22.95    | 59.198    | Eastern | XXX              | 4,842,487 | 4,829,145      | YES             | YES       | YES       | YES       | NO        | NO        | NO        | NO        |
| <i>T. hajarensis</i> | S7161         | 24       | Oman    | 22.616   | 59.094    | Eastern | KT302067         | 6,787,797 | 6,777,425      | YES             | YES       | YES       | YES       | NO        | NO        | NO        | YES       |
| <i>T. hajarensis</i> | CN10786       | 24       | Oman    | 22.616   | 59.094    | Eastern | XXX              | 477,79    | 476,704        | YES             | YES       | YES       | YES       | NO        | NO        | NO        | NO        |
| <i>T. hajarensis</i> | CN10793       | 24       | Oman    | 22.616   | 59.094    | Eastern | XXX              | 743,334   | 742,037        | YES             | YES       | YES       | YES       | NO        | NO        | NO        | NO        |
| <i>T. hajarensis</i> | CN3857        | 25       | Oman    | 22.541   | 59.641    | Eastern | XXX              | 936,911   | 934,448        | YES             | YES       | YES       | YES       | NO        | NO        | NO        | NO        |
| <i>T. hajarensis</i> | CN3769        | 25       | Oman    | 22.541   | 59.642    | Eastern | XXX              | 558,198   | 556,537        | YES             | YES       | YES       | YES       | NO        | NO        | NO        | NO        |
| <i>T. hajarensis</i> | CN4226        | 26       | Oman    | 22.107   | 59.357    | Eastern | KT302089         | 9,600,663 | 9,587,672      | YES             | YES       | YES       | YES       | YES       | NO        | NO        | YES       |
| <i>T. hajarensis</i> | CN4215        | 26       | Oman    | 22.107   | 59.357    | Eastern | XXX              | 726,547   | 725,041        | YES             | YES       | YES       | YES       | NO        | NO        | NO        | NO        |
| <i>T. hajarensis</i> | CN10775       | 26       | Oman    | 22.107   | 59.357    | Eastern | -                | 4,403,945 | 4,394,347      | YES             | YES       | YES       | YES       | NO        | YES       | NO        | YES       |
| <i>T. hajarensis</i> | CN10791       | 26       | Oman    | 22.107   | 59.357    | Eastern | XXX              | 5,603,416 | 5,593,156      | YES             | YES       | YES       | YES       | NO        | YES       | NO        | NO        |
| <i>T. hajarensis</i> | CN677         | 27       | Oman    | 20.498   | 58.931    | Masirah | KT302085         | 2,521,949 | 2,519,348      | YES             | YES       | YES       | YES       | YES       | YES       | YES       | YES       |
| <i>T. hajarensis</i> | CN3458        | 28       | Oman    | 20.334   | 58.789    | Masirah | XXX              | 3,505,223 | 3,498,383      | YES             | YES       | YES       | YES       | YES       | YES       | YES       | YES       |
| <i>T. hajarensis</i> | CN870         | 28       | Oman    | 20.333   | 58.789    | Masirah | XXX              | 1,303,376 | 1,300,819      | YES             | YES       | YES       | YES       | NO        | NO        | NO        | YES       |
| <i>T. hajarensis</i> | S1755         | 29       | Oman    | 20.312   | 58.737    | Masirah | XXX              | 943,7     | 941,956        | YES             | YES       | YES       | YES       | NO        | NO        | NO        | NO        |



**Table S2: dataset specifications. uSNPs: Unlinked Single Nucleotide Polymorphisms; Ind: Missing data allowed per individual; gen: Missing genotype call rate allowed; bp: Base pairs.**

| <b>dataset name</b>    | <b>dataset type</b> | <b>Analysis</b>                                             | <b>Postprocessing filtering (%)</b> | <b>n° of individuals</b> | <b>dataset length (bp)</b> | <b>n° of loci</b> | <b>n° of SNPs</b> | <b>Missingness (%)</b> |
|------------------------|---------------------|-------------------------------------------------------------|-------------------------------------|--------------------------|----------------------------|-------------------|-------------------|------------------------|
| <i>dataset 1</i>       | <i>uSNPs</i>        | AdMIXTURE & PCA                                             | 78 ind – 40 gen                     | 42                       | 2,428                      | 2,428             | 2,428             | 18.57                  |
| <i>dataset 2</i>       | <i>loci</i>         | fineRADstructure                                            | Not filtered                        | 42                       | 1,973,898                  | 30,526            | 99,828            | 63.98                  |
| <i>dataset 3</i>       | <i>loci</i>         | raxml-ng, IQTREE, BEAST, SplitsTree, MAST & dsuite          | 78 ind – 40 gen                     | 47                       | 338,507                    | 5,219             | 30,096            | 22.21                  |
| <i>dataset 4 SNAPP</i> | <i>uSNPs</i>        | Species tree inference and Species delimitation             | 10 gen                              | 10                       | 2,147                      | 2,147             | 2,147             | 4.23                   |
| <i>dataset 5 SNAPP</i> | <i>uSNPs</i>        | Species tree inference                                      | 10 gen                              | 10                       | 3,210                      | 3,210             | 3,210             | 4.88                   |
| <i>dataset 6 SNAPP</i> | <i>uSNPs</i>        | Species tree inference                                      | 10 gen                              | 10                       | 2,897                      | 2,897             | 2,897             | 4.84                   |
| <i>dataset 7 SNAPP</i> | <i>uSNPs</i>        | Species tree inference                                      | 10 gen                              | 20                       | 2,731                      | 2,731             | 2,731             | 9.72                   |
| <i>dataset 4 BPP</i>   | <i>loci</i>         | Species tree inference, Species delimitation and <i>gdi</i> | 60 gen                              | 10                       | 261,420                    | 4,357             | 20,246            | 15.54                  |
| <i>dataset 5 BPP</i>   | <i>loci</i>         | Species tree inference                                      | 60 gen                              | 10                       | 271,980                    | 4,533             | 19,966            | 13.7                   |
| <i>dataset 6 BPP</i>   | <i>loci</i>         | Species tree inference                                      | 60 gen                              | 10                       | 266,460                    | 4,441             | 20,262            | 15.3                   |
| <i>dataset 7 BPP</i>   | <i>loci</i>         | Species tree inference                                      | 60 gen                              | 20                       | 315,240                    | 5,254             | 26,103            | 27.2                   |

**Table S4.** Nested analysis of variance table. Response variable shown in this nested ANOVA correspond to topology weights 1. However, the exact same results were obtained when using topology weights 2. Dist ME: Distance between Masirah and Eastern specimens

| <b>Response Topo1</b>    |           |               |                |                |                  |
|--------------------------|-----------|---------------|----------------|----------------|------------------|
|                          | <b>DF</b> | <b>Sum_sq</b> | <b>Mean_Sq</b> | <b>F value</b> | <b>Pr(&gt;F)</b> |
| <i>Dist ME</i>           | 1         | 45.892        | 45.89          | 11,399.25      | << 0.01          |
| <i>Dist ME:replicate</i> | 3,359     | 13.523        | 0.004          | 1,585          | << 0.01          |
| <i>Residuals</i>         | 34,439    | 87.472        | 0.003          |                |                  |

**Table S4.** Nested analysis of variance table. Response variable shown in this nested ANOVA correspond to topology weights 1. However, the exact same results were obtained when using topology weights 2. Dist CE: Distance between Central and Eastern specimens

| <b>Response Topo1</b>    |           |               |                |                |                  |
|--------------------------|-----------|---------------|----------------|----------------|------------------|
|                          | <b>DF</b> | <b>Sum_sq</b> | <b>Mean_Sq</b> | <b>F value</b> | <b>Pr(&gt;F)</b> |
| <i>Dist CE</i>           | 1         | 53.144        | 53.144         | 3,801.42       | << 0.01          |
| <i>Dist CE:replicate</i> | 2,015     | 28.17         | 0.014          | 7.629          | << 0.01          |
| <i>Residuals</i>         | 35,783    | 65.572        | 0.002          |                |                  |

**Table S5:** Results of BFD\* testing the support of the competing species hypotheses. For each hypothesis we show Maximum Likelihood Estimates (MLE), their Bayes Factors ( $2 \times (H0 - Hi)$ ), the rank and the strength of support  $\ln(BF)$ . Additionally, we show the specimens assigned to each putative species hypothesis.

| <b>Species delimitation hypothesis</b>                                             | <b>MLE</b> | <b>BF</b>      | <b>Rank</b> | <b>strength of support</b> |
|------------------------------------------------------------------------------------|------------|----------------|-------------|----------------------------|
| <b>H0:</b> <i>T. hajarensis</i> vs <i>T. spatalurus</i>                            | 12979,10   | 0              | 4           | -                          |
| <b>H1:</b> <i>T. spatalurus</i> vs Western+Central vs Masirah + Eastern clades     | 12110,69   | 1736,82        | 3           | 7,46                       |
| <b>H2:</b> <i>T. spatalurus</i> vs Western + Central vs Eastern vs Masirah clades  | 11515,77   | 2926,65        | 2           | 7,98                       |
| <b>H3:</b> <i>T. spatalurus</i> vs Western vs Central vs Eastern vs Masirah clades | 11438,92   | <b>3080,36</b> | <b>1</b>    | <b>8,03</b>                |



---

**Specimen assignment**

---

Western: CN7658, CN8681

Central: CN3979, CN664

Eastern: CN4226, CN686

Masirah: CN3458, CN677

*T. spatalurus*: CN10658, TMHC\_2013\_10\_405
